# Supplementary material for: Evaluation and comparison of multi-omics data integration methods for cancer subtyping
Source: PLoS Comput Biol. 2021 Aug 12;17(8):e1009224. doi: 10.1371/journal.pcbi.1009224 (PMC8384175; doi:10.1371/journal.pcbi.1009224)
Supplement: S4 File — (XLSX) [file pcbi.1009224.s004.xlsx]

## Sheet: NMI
S4 File. Robustness Calculation of Dataset group #2.
Dataset #2 BRCA Noise Datasets NMI
Methods		iClusterBayes					LRAcluster					SNF
Data Comb.	Noise Level	0.5	1	2	3	4	0.5	1	2	3	4	0.5	1	2	3	4
m_mi	C=2	0.961738	0.887587	0.791055	0.716355	0.71884	0.94286	0.882311	0.870284	0.7298	0.7126	0.854508	0.68029	0.58711	0.559468	0.440014
	C=3	0.912645	0.863882	0.760656	0.635378	0.633515	0.913665	0.87841	0.837795	0.692449	0.66843	0.825892	0.803665	0.681709	0.593947	0.446894
	C=4	0.683754	0.324827	0.27446	0.278614	0.408352	0.973514	0.924081	0.736355	0.720345	0.613919	0.884475	0.797759	0.675497	0.523836	0.399903
	C=5	0.617103	0.165943	0.170242	0.206796	0.293833	0.930664	0.92626	0.831973	0.679521	0.615433	0.886769	0.747068	0.634467	0.493263	0.354643
	C=6	0.361282	0.0983253	0.0892154	0.203667	0.17806	0.916244	0.895863	0.770935	0.676549	0.633686	0.849576	0.719697	0.602653	0.441809	0.345444
	C=7	0.108001	0.0633357	0.0384497	0.117778	0.113729	0.729559	0.731967	0.813922	0.672647	0.583377	0.840439	0.70133	0.655128	0.38094	0.28626
	C=8	0.0855953	0.0813072	0.0413378	0.143556	0.113351	0.950939	0.873702	0.81303	0.680799	0.577029	0.682685	0.578682	0.565383	0.382331	0.283754
m_me	C=2	0.957547	0.902044	0.80849	0.791387	0.706491	0.911958	0.87734	0.831057	0.754788	0.685778	0.904218	0.747908	0.556901	0.448416	0.420817
	C=3	0.90077	0.799915	0.735612	0.656709	0.296986	0.956456	0.879132	0.835855	0.824019	0.67967	0.950358	0.889016	0.782889	0.746722	0.599307
	C=4	0.567342	0.767397	0.782628	0.733326	0.648859	0.94474	0.895981	0.797811	0.785301	0.729087	0.558293	0.56401	0.488928	0.485229	0.447352
	C=5	0.458743	0.488165	0.382191	0.290373	0.42976	0.958406	0.86088	0.80204	0.802906	0.540423	0.866511	0.751238	0.661341	0.570791	0.504715
	C=6	0.384482	0.151313	0.13513	0.169345	0.353121	0.947282	0.864512	0.668965	0.706143	0.605247	0.804592	0.767684	0.609478	0.593892	0.51034
	C=7	0.120854	0.0686193	0.0876311	0.195725	0.110521	0.91575	0.940514	0.645691	0.627891	0.567304	0.727603	0.739673	0.63261	0.581808	0.504371
	C=8	0.0402353	0.0434631	0.0739119	0.0985412	0.09529	0.960839	0.936402	0.668858	0.759373	0.675453	0.886033	0.791168	0.663014	0.626565	0.511454
m_cnv	C=2	0.89309	0.845254	0.821216	0.755803	0.635538	0.936229	0.877959	0.760413	0.789783	0.655895	0.843163	0.797423	0.704342	0.659948	0.585066
	C=3	0.907893	0.870654	0.786203	0.725998	0.615529	0.946001	0.901003	0.80372	0.749378	0.655921	0.891346	0.791553	0.652607	0.575158	0.518592
	C=4	0.813055	0.711162	0.609331	0.589645	0.608612	0.946369	0.928125	0.822055	0.715414	0.670728	0.882364	0.71736	0.528358	0.442018	0.376522
	C=5	0.490019	0.358888	0.396649	0.439872	0.514889	0.847057	0.912656	0.82034	0.657889	0.626684	0.837218	0.756455	0.614175	0.473386	0.400978
	C=6	0.224442	0.172675	0.202762	0.32894	0.368	0.957501	0.660141	0.65482	0.622735	0.557235	0.761413	0.614322	0.523763	0.483482	0.368698
	C=7	0.149587	0.13231	0.142496	0.175647	0.183753	0.962753	0.931102	0.802393	0.666266	0.607501	0.83637	0.727401	0.673803	0.486812	0.422818
	C=8	0.0682314	0.10235	0.0989551	0.152622	0.166821	0.947835	0.914018	0.799761	0.602972	0.624969	0.67696	0.590883	0.513354	0.451772	0.386573
mi_me	C=2	0.0037572	0.518497	0.0374016	0.018184	0.015636	0.898722	0.739827	0.63645	0.731477	0.665857	0.887791	0.779592	0.60377	0.343363	0.29539
	C=3	0.896873	0.867932	0.697116	0.772381	0.657229	0.897103	0.898843	0.846366	0.74686	0.671694	0.885699	0.790137	0.670618	0.497898	0.286087
	C=4	0.688325	0.357594	0.164168	0.292036	0.393222	0.923666	0.905585	0.822169	0.729202	0.606416	0.76288	0.627267	0.539692	0.458238	0.372463
	C=5	0.387815	0.292377	0.237788	0.286232	0.311632	0.931572	0.828393	0.820582	0.604225	0.590566	0.883047	0.743953	0.617584	0.416358	0.376728
	C=6	0.173912	0.0532833	0.0835095	0.19808	0.255905	0.88344	0.818285	0.82048	0.687223	0.637384	0.684453	0.55507	0.510613	0.448729	0.316865
	C=7	0.0427622	0.0515768	0.031309	0.0826451	0.0809861	0.939672	0.877721	0.841117	0.62668	0.570832	0.718492	0.59073	0.474995	0.421534	0.263207
	C=8	0.0416765	0.0265288	0.0302481	0.0285205	0.0388336	0.916592	0.697176	0.711078	0.648165	0.548645	0.815764	0.729634	0.570827	0.410014	0.301108
mi_cnv	C=2	0.84584	0.669111	0.236827	0.223434	0.197916	0.934055	0.926078	0.841518	0.732127	0.634467	0.807053	0.687493	0.629058	0.476311	0.381265
	C=3	0.836756	0.638205	0.657547	0.575894	0.448355	0.931912	0.932121	0.821538	0.680096	0.624064	0.791018	0.714412	0.520939	0.417068	0.297872
	C=4	0.763842	0.63258	0.412791	0.521375	0.396457	0.922892	0.923453	0.815171	0.702634	0.615808	0.78925	0.624836	0.405393	0.308867	0.229634
	C=5	0.360616	0.331894	0.31567	0.347087	0.387711	0.947773	0.893718	0.773432	0.698701	0.462712	0.546934	0.54597	0.374553	0.308975	0.18661
	C=6	0.325821	0.164607	0.279502	0.171498	0.279199	0.935434	0.868858	0.77526	0.647348	0.494288	0.748712	0.651461	0.445449	0.312817	0.16725
	C=7	0.141515	0.112418	0.0931895	0.127325	0.110606	0.804744	0.837747	0.704881	0.602974	0.529923	0.776576	0.586526	0.473499	0.347328	0.206443
	C=8	0.238425	0.101217	0.141031	0.135904	0.148255	0.949294	0.756827	0.632247	0.599649	0.5176	0.759866	0.649732	0.530895	0.313713	0.188094
me_cnv	C=2	0.925156	0.871289	0.796339	0.740838	0.663771	0.933771	0.883549	0.823547	0.754378	0.659201	0.871275	0.696251	0.605625	0.576499	0.456435
	C=3	0.684161	0.725221	0.746429	0.619347	0.580716	0.781437	0.799721	0.740103	0.739645	0.605272	0.845217	0.765444	0.658218	0.549663	0.304528
	C=4	0.660594	0.50839	0.490766	0.592432	0.491389	0.797142	0.795477	0.762543	0.726808	0.628544	0.626845	0.509313	0.446285	0.427587	0.407913
	C=5	0.542668	0.27761	0.377621	0.263662	0.297418	0.55485	0.542337	0.550783	0.510872	0.481498	0.842825	0.735926	0.520681	0.451941	0.435891
	C=6	0.214812	0.266783	0.156607	0.286719	0.22412	0.55568	0.566773	0.528559	0.727382	0.533245	0.65904	0.569218	0.514832	0.430273	0.38437
	C=7	0.0951373	0.145803	0.14806	0.188747	0.151747	0.643683	0.658285	0.607716	0.632189	0.567694	0.777969	0.702188	0.551976	0.476918	0.444364
	C=8	0.0370544	0.0950049	0.0746124	0.211298	0.1927	0.707961	0.683184	0.685808	0.761415	0.568908	0.800706	0.709725	0.597057	0.517326	0.437355
m_mi_me	C=2	0.933444	0.868523	0.815832	0.768322	0.684449	0.851411	0.866621	0.861249	0.727269	0.721165	0.90233	0.849485	0.705622	0.637975	0.575646
	C=3	0.80349	0.64758	0.534734	0.660991	0.581818	0.962841	0.920938	0.852832	0.827132	0.727885	0.885997	0.838302	0.759989	0.732733	0.607253
	C=4	0.767876	0.738279	0.753813	0.614931	0.666536	0.961652	0.850083	0.879578	0.80417	0.733474	0.877735	0.598328	0.554634	0.463622	0.404978
	C=5	0.527578	0.415612	0.279612	0.293395	0.369776	0.965873	0.8517	0.867566	0.760891	0.593101	0.897774	0.773354	0.605602	0.531546	0.436859
	C=6	0.166549	0.322356	0.152513	0.259197	0.385141	0.89663	0.77396	0.604181	0.72693	0.630383	0.639624	0.583465	0.522929	0.485729	0.410098
	C=7	0.0963466	0.0842371	0.0399052	0.145339	0.282662	0.955322	0.632011	0.82467	0.759292	0.615606	0.853363	0.693081	0.572247	0.48876	0.389138
	C=8	0.0311325	0.0351105	0.04034	0.0544149	0.0570074	0.944065	0.880322	0.796872	0.759243	0.637857	0.902406	0.814164	0.639949	0.529421	0.415701
m_mi_cnv	C=2	0.935915	0.857386	0.788131	0.7808	0.659377	0.92898	0.876261	0.789595	0.750172	0.654514	0.840223	0.762856	0.618085	0.667524	0.490322
	C=3	0.887634	0.838336	0.735179	0.700296	0.663149	0.919699	0.893247	0.807853	0.734693	0.666929	0.876764	0.818895	0.668549	0.649034	0.471746
	C=4	0.660773	0.809525	0.586994	0.569364	0.539974	0.976808	0.916792	0.800897	0.733738	0.645566	0.846213	0.743965	0.454495	0.383547	0.324029
	C=5	0.395593	0.385279	0.30409	0.462186	0.337109	0.938947	0.925756	0.798065	0.661035	0.652604	0.789573	0.697731	0.5284	0.417791	0.354768
	C=6	0.288122	0.251156	0.241654	0.267574	0.318272	0.892953	0.902387	0.629006	0.695184	0.549677	0.83094	0.699063	0.529328	0.427105	0.336515
	C=7	0.118362	0.0641367	0.106723	0.0937524	0.0986717	0.934647	0.89576	0.801207	0.687792	0.559505	0.664441	0.682302	0.489404	0.412403	0.337341
	C=8	0.089911	0.104458	0.11723	0.180869	0.1314	0.913109	0.82548	0.834463	0.610304	0.603289	0.759829	0.58778	0.508477	0.462425	0.383975
m_me_cnv	C=2	0.965911	0.932636	0.850453	0.787211	0.720547	0.962063	0.943153	0.840034	0.792553	0.748391	0.901196	0.731295	0.644851	0.492361	0.500877
	C=3	0.925809	0.896181	0.825118	0.795282	0.722875	0.948921	0.913394	0.866242	0.820587	0.74729	0.919537	0.838663	0.721007	0.624867	0.599754
	C=4	0.617542	0.767854	0.51042	0.723669	0.603023	0.983016	0.873761	0.838236	0.602356	0.558408	0.845999	0.70811	0.538085	0.452898	0.381381
	C=5	0.448476	0.348944	0.4045	0.459423	0.365038	0.941751	0.702406	0.757002	0.680701	0.668723	0.808601	0.607391	0.537546	0.447125	0.407196
	C=6	0.21324	0.0884091	0.208906	0.274456	0.25311	0.862447	0.871594	0.804102	0.805824	0.60587	0.614189	0.498685	0.559225	0.490268	0.40632
	C=7	0.184061	0.128705	0.195426	0.317898	0.247204	0.971473	0.837233	0.821723	0.817878	0.618869	0.728821	0.561549	0.511378	0.492708	0.422905
	C=8	0.0882417	0.042918	0.0876439	0.120284	0.118386	0.961273	0.915001	0.744079	0.723007	0.591595	0.883598	0.649607	0.536174	0.480175	0.443458
mi_me_cnv	C=2	0.933188	0.878036	0.788957	0.745575	0.678529	0.966581	0.891119	0.845157	0.76028	0.66945	0.900552	0.799539	0.680903	0.286498	0.298819
	C=3	0.857455	0.666876	0.670248	0.627817	0.619219	0.770765	0.787536	0.753805	0.731277	0.637227	0.904602	0.783555	0.640552	0.553061	0.506595
	C=4	0.723197	0.632254	0.632719	0.636518	0.604244	0.657563	0.653282	0.648563	0.682949	0.551676	0.832939	0.481548	0.417902	0.378511	0.348183
	C=5	0.262624	0.447947	0.207848	0.405984	0.344493	0.538176	0.537968	0.537824	0.504847	0.466435	0.630865	0.530182	0.445086	0.392103	0.31946
	C=6	0.257976	0.133602	0.176613	0.153677	0.246505	0.543564	0.564339	0.53227	0.670902	0.522084	0.799464	0.673553	0.501546	0.448142	0.37696
	C=7	0.117108	0.0586477	0.122908	0.0819055	0.11631	0.640613	0.660797	0.61117	0.609368	0.548706	0.692986	0.547111	0.476129	0.409616	0.347459
	C=8	0.130981	0.0939827	0.0903199	0.127702	0.125085	0.691187	0.812482	0.605617	0.648815	0.546139	0.787849	0.601172	0.503803	0.396567	0.323015
m_mi_me_cnv	C=2	0.925943	0.943072	0.828029	0.821985	0.747114	0.940984	0.917505	0.854673	0.764908	0.746445	0.92042	0.813924	0.799436	0.631317	0.678034
	C=3	0.758779	0.850146	0.729285	0.792436	0.757663	0.977173	0.93248	0.888843	0.795012	0.74253	0.888857	0.837074	0.715368	0.673314	0.561365
	C=4	0.752949	0.805479	0.536274	0.61036	0.669038	0.953284	0.574645	0.575323	0.67092	0.758483	0.832154	0.749074	0.515055	0.432368	0.406024
	C=5	0.352735	0.327941	0.232235	0.428162	0.325736	0.800159	0.869552	0.830109	0.737729	0.499619	0.871911	0.734277	0.617594	0.468221	0.414336
	C=6	0.343044	0.186897	0.223134	0.171997	0.312252	0.955241	0.86996	0.642302	0.784446	0.621977	0.753324	0.55134	0.515031	0.474057	0.392452
	C=7	0.175615	0.129186	0.175298	0.20707	0.197458	0.96398	0.841639	0.860304	0.801417	0.660755	0.831319	0.728143	0.617921	0.471641	0.383516
	C=8	0.15841	0.0880553	0.0972251	0.154473	0.102397	0.941044	0.896387	0.677635	0.807333	0.580472	0.672698	0.668053	0.545432	0.477589	0.385761
Methods		PFA					PINS					NEMO
Data Comb.	Noise Level	0.5	1	2	3	4	0.5	1	2	3	4	0.5	1	2	3	4
m_mi	C=2	0.017371	0.0442988	0.000732518	0.000240193	0.0016432	0.574291	0.609083	0.532578	0.350872	0.297687	0.887211	0.791222	0.708706	0.607775	0.466414
	C=3	0.0432267	0.0257646	0.00654991	0.00673156	0.00570771						0.886817	0.823132	0.70275	0.564807	0.486545
	C=4	0.0385781	0.0181212	0.00843478	0.0159285	0.00471029						0.915356	0.790112	0.699874	0.556528	0.444917
	C=5	0.0260533	0.0236366	0.0158192	0.0147895	0.00906614						0.851748	0.725282	0.663827	0.483004	0.379619
	C=6	0.0609167	0.0286247	0.0107833	0.0234307	0.00945459						0.865925	0.753753	0.633308	0.478489	0.382895
	C=7	0.107596	0.0359112	0.0164024	0.0121117	0.0101972						0.881953	0.735541	0.613298	0.441276	0.338291
	C=8	0.103262	0.0299189	0.0320485	0.0278254	0.0159908						0.785371	0.680334	0.519116	0.378362	0.291562
m_me	C=2	0.000481378	0.00123384	0.000416861	0.000352981	0.000841902	0.547513	0.855204	0.543511	0.264581	0.255487	0.8436	0.778137	0.680455	0.588537	0.555063
	C=3	0.0136822	0.00498748	0.0058437	0.00144851	0.00381493						0.909307	0.877575	0.781553	0.726474	0.642855
	C=4	0.0526656	0.00328764	0.00809869	0.0109373	0.00511667						0.920683	0.758027	0.629929	0.58882	0.515583
	C=5	0.0266649	0.00615682	0.0126427	0.01322	0.0080166						0.865773	0.753934	0.62543	0.543382	0.508814
	C=6	0.0490464	0.0103039	0.0144446	0.0105674	0.0130107						0.817081	0.699602	0.654878	0.58093	0.507211
	C=7	0.0543957	0.0137628	0.0221699	0.0199626	0.0229602						0.826706	0.749964	0.563984	0.57671	0.468802
	C=8	0.0575331	0.0144804	0.0207457	0.0206503	0.0171153						0.780867	0.762633	0.679386	0.604643	0.47503
m_cnv	C=2	0.0943495	0.00713037	0.00030665	0.00366663	6.11327e-05	0.676113	0.842474	0.791852	0.655108	0.55709	0.94511	0.822098	0.814367	0.714246	0.601697
	C=3	0.0771749	0.00295118	0.00742091	0.00656646	0.000931002						0.89329	0.828423	0.675231	0.604704	0.539321
	C=4	0.0796882	0.00659961	0.00994436	0.00449653	0.011654						0.578467	0.52781	0.49097	0.44678	0.361542
	C=5	0.108734	0.0111301	0.0123958	0.0111646	0.00945397						0.882429	0.849594	0.669752	0.513257	0.364719
	C=6	0.0669232	0.0171764	0.0141948	0.0123735	0.0207555						0.869322	0.826829	0.631988	0.493243	0.39207
	C=7	0.0693933	0.0198838	0.0216388	0.0181515	0.0135898						0.681631	0.647163	0.548941	0.389392	0.414054
	C=8	0.105937	0.0214314	0.0167244	0.0280546	0.0199823						0.780968	0.718089	0.574815	0.458731	0.413722
mi_me	C=2	0.115069	5.69614e-06	0.00171261	0.00291774	5.13681e-05	0.810181	0.762994	0.347886	0.424134	0.205089	0.830436	0.78183	0.515742	0.326678	0.286692
	C=3	0.066587	0.0120345	0.00715277	7.55667e-05	0.00653062						0.870364	0.813624	0.328674	0.274903	0.276194
	C=4	0.111859	0.00960364	0.00407647	0.0101894	0.00622						0.86224	0.748893	0.611073	0.585931	0.498648
	C=5	0.0739952	0.0162578	0.00922707	0.0101346	0.00707263						0.875087	0.757941	0.626264	0.429381	0.392312
	C=6	0.128217	0.0113052	0.0178833	0.0141508	0.016428						0.624555	0.755558	0.539041	0.456654	0.378113
	C=7	0.100147	0.0201051	0.0244566	0.0178467	0.0143431						0.561764	0.570946	0.46318	0.429557	0.328067
	C=8	0.119096	0.0273761	0.0306952	0.0359355	0.0195641						0.746397	0.585571	0.510258	0.471985	0.33651
mi_cnv	C=2	0.106309	0.00424852	0.00487887	4.80448e-05	1.70992e-05	0.847592	0.59606	0.569561	0.425353	0.341484	0.899874	0.750812	0.627596	0.477038	0.405543
	C=3	0.0185052	0.00270201	0.000976635	0.00300949	0.000804665						0.854667	0.696932	0.513512	0.384808	0.297922
	C=4	0.0519759	0.0129056	0.0102954	0.00617578	0.00613262						0.746333	0.654051	0.441538	0.288619	0.250712
	C=5	0.0486291	0.029746	0.00986017	0.0097911	0.010693						0.747066	0.657827	0.372106	0.271647	0.26226
	C=6	0.0639082	0.0205396	0.00951087	0.00992194	0.00931711						0.800073	0.493876	0.46308	0.312329	0.19884
	C=7	0.102546	0.0392796	0.0275432	0.017055	0.0121809						0.643936	0.637737	0.431714	0.305938	0.192559
	C=8	0.149601	0.0392805	0.0329094	0.0212218	0.0262202						0.696037	0.608053	0.406037	0.286033	0.180123
me_cnv	C=2	0.0329576	0.00871946	0.0056647	0.00109541	0.000395261	0.961194	0.922226	0.87883	0.00773294	0.0114693	0.840899	0.764407	0.688582	0.608409	0.517652
	C=3	0.0340351	0.00321112	0.00485925	0.00567047	0.00401632						0.821236	0.707977	0.369948	0.359392	0.298167
	C=4	0.073562	0.0137344	0.0144674	0.00373576	0.00327682						0.847895	0.787169	0.763968	0.595438	0.545642
	C=5	0.063257	0.00849962	0.011392	0.00842576	0.00782787						0.86735	0.709231	0.552368	0.479451	0.464282
	C=6	0.0724094	0.0191389	0.0149224	0.0143624	0.0103428						0.881065	0.814173	0.689455	0.573589	0.512886
	C=7	0.0872102	0.0189029	0.0167474	0.0140364	0.0198086						0.846447	0.789083	0.658399	0.517669	0.430335
	C=8	0.0841748	0.0350082	0.0175453	0.0164181	0.0180893						0.814087	0.760693	0.692638	0.522601	0.431829
m_mi_me	C=2	0.124162	0.0105641	0.00298856	0.00109438	0.00218026	0.19116	0.336118	0.848834	0.290917	0.36136	0.903712	0.826992	0.719567	0.603765	0.568264
	C=3	0.0592343	0.0079823	0.0326008	0.0125367	0.00389662						0.945563	0.914169	0.808602	0.73413	0.634258
	C=4	0.0616642	0.0163826	0.0101722	0.00498836	0.00508006						0.727379	0.697777	0.559193	0.47506	0.437764
	C=5	0.093361	0.0149765	0.0179479	0.0112361	0.00553698						0.921683	0.794626	0.592398	0.524211	0.429134
	C=6	0.0662694	0.0291071	0.0169195	0.0139832	0.00652749						0.874961	0.743506	0.580391	0.535045	0.452951
	C=7	0.0772983	0.0789961	0.0222156	0.0167554	0.0187137						0.871936	0.692663	0.666856	0.484274	0.454586
	C=8	0.0931774	0.0505877	0.0332595	0.0233371	0.0180669						0.814026	0.788803	0.662178	0.533296	0.432826
m_mi_cnv	C=2	0.000172874	0.00308557	0.00313666	0.0020031	0.00320229	0.386929	0.81878	0.755132	0.286013	0.237213	0.917664	0.84103	0.697108	0.696178	0.580663
	C=3	0.0246277	0.00197924	0.00444658	0.00503022	0.0118812						0.873861	0.862737	0.733079	0.676935	0.552668
	C=4	0.056489	0.0116495	0.011262	0.00325043	0.00320679						0.796569	0.731738	0.656585	0.552339	0.396628
	C=5	0.0507903	0.0128068	0.00666677	0.0110135	0.0106562						0.834809	0.747768	0.641062	0.502974	0.379507
	C=6	0.036661	0.0190521	0.0131823	0.0197221	0.0193606						0.64977	0.774075	0.641979	0.462027	0.343156
	C=7	0.0621441	0.0227209	0.0226099	0.0153391	0.0256827						0.600659	0.542031	0.580288	0.364401	0.357387
	C=8	0.11738	0.0267403	0.0288735	0.0188899	0.0221485						0.889789	0.769612	0.517294	0.397577	0.330725
m_me_cnv	C=2	0.000117193	0.000533949	0.00342191	0.00313919	0.00115484	0.461055	0.181547	0.164143	0.245862	0.539095	0.852029	0.801107	0.764411	0.644368	0.624993
	C=3	0.0530406	0.00309818	0.00929994	0.00740938	0.00821586						0.900704	0.816389	0.687035	0.654337	0.618877
	C=4	0.13314	0.00656676	0.0189488	0.00693383	0.0089247						0.821298	0.715172	0.552606	0.500926	0.428535
	C=5	0.172468	0.00787292	0.0233919	0.0150795	0.0114649						0.809821	0.708582	0.51539	0.465688	0.413823
	C=6	0.157548	0.00854163	0.0241252	0.0222687	0.0201902						0.652419	0.762026	0.693874	0.553888	0.457501
	C=7	0.180317	0.011919	0.0259008	0.0254897	0.0148389						0.692373	0.683588	0.57091	0.501416	0.441368
	C=8	0.20261	0.0113338	0.0274323	0.0288502	0.021149						0.754208	0.764658	0.574222	0.504277	0.436984
mi_me_cnv	C=2	0.00471688	0.00230357	0.00237215	0.00321566	0.00203161	0.812027	0.707924	0.563419	0.0762527	0.0723335	0.877339	0.760709	0.603319	0.370321	0.38389
	C=3	0.0474812	0.00197778	0.00310725	0.00215406	0.00769367						0.830577	0.750994	0.669859	0.540311	0.421995
	C=4	0.0530404	0.0128606	0.00505073	0.00588944	0.0027817						0.427119	0.406975	0.414336	0.379994	0.359207
	C=5	0.0455352	0.0200567	0.0145417	0.0105043	0.0215861						0.633755	0.701346	0.582588	0.494594	0.402777
	C=6	0.0798146	0.0191233	0.0159606	0.0182349	0.0109708						0.834256	0.574287	0.508761	0.433638	0.375234
	C=7	0.115802	0.0296807	0.0143535	0.0266184	0.0181836						0.52946	0.564776	0.459005	0.392699	0.316724
	C=8	0.140272	0.0519155	0.0311845	0.0227179	0.0246163						0.649039	0.560294	0.500702	0.434617	0.319983
m_mi_me_cnv	C=2	0.00122931	0.00211255	0.0020031	0.00222143	0.00244344	0.526474	0.462716	0.462818	0.290963	0.230535	0.911257	0.858764	0.830742	0.631679	0.619381
	C=3	0.0237201	0.0033849	0.00460392	0.00214226	0.00662045						0.908156	0.831759	0.765056	0.719701	0.627894
	C=4	0.105941	0.0234398	0.00575102	0.005396	0.0147978						0.765379	0.762533	0.523632	0.496333	0.403682
	C=5	0.183612	0.0168236	0.00965599	0.014099	0.0150253						0.868589	0.55	0.633183	0.454931	0.400556
	C=6	0.181806	0.0441187	0.0170253	0.0143231	0.0208292						0.748522	0.709532	0.55248	0.460131	0.400443
	C=7	0.191001	0.0404637	0.0195019	0.0229404	0.0177759						0.843237	0.719823	0.573675	0.565214	0.446291
	C=8	0.231994	0.0679374	0.0410413	0.0219612	0.0208782						0.806176	0.747567	0.612463	0.466728	0.440953
Methods		moCluster					CIMLR					multiNMF
Data Comb.	Noise Level	0.5	1	2	3	4	0.5	1	2	3	4	0.5	1	2	3	4
m_mi	C=2	0.28653	0.276198	0.272394	0.0558181	0.0611379	0.586157	0.475339	0.288615	0.198334	0.0794842	0.532485	0.423594	0.357214	0.0483418	0.0226525
	C=3	0.385499	0.457571	0.388636	0.0509422	0.0598752	0.60493	0.493932	0.341752	0.169048	0.0691017	0.820903	0.622343	0.361937	0.168434	0.0294376
	C=4	0.432301	0.499153	0.424887	0.0537968	0.0582593	0.655605	0.406282	0.273183	0.135936	0.0254721	0.497167	0.580923	0.391704	0.165629	0.038932
	C=5	0.639339	0.6173	0.529403	0.049373	0.0565907	0.629262	0.404588	0.233227	0.143009	0.0143814	0.667598	0.656101	0.413252	0.185669	0.0755373
	C=6	0.669604	0.69291	0.525418	0.0484981	0.058773	0.640739	0.420464	0.186277	0.119042	0.0552384	0.736167	0.642345	0.40707	0.179988	0.0306288
	C=7	0.681239	0.688371	0.523423	0.0540293	0.061621	0.62321	0.455827	0.19404	0.103707	0.035797	0.661206	0.569887	0.375963	0.213592	0.088094
	C=8	0.69398	0.693861	0.516094	0.0527706	0.0626931	0.610848	0.370183	0.187684	0.122894	0.0292985	0.595417	0.5664	0.411713	0.187673	0.0777096
m_me	C=2	0.381608	0.173141	0.438222	0.345271	0.136032	0.750709	0.816891	0.626319	0.638731	0.452833	0.714875	0.623527	0.011513	0.00632071	0.00645377
	C=3	0.390902	0.245452	0.465523	0.338994	0.2094	0.835333	0.728955	0.564861	0.572892	0.478716	0.905078	0.507873	0.406418	0.0629326	0.0939102
	C=4	0.422453	0.254278	0.453834	0.287407	0.176996	0.796262	0.720436	0.572255	0.499595	0.443427	0.898562	0.672202	0.626382	0.340008	0.0285584
	C=5	0.511538	0.270257	0.400557	0.266034	0.169416	0.693894	0.591805	0.537544	0.489189	0.384482	0.881823	0.810879	0.70291	0.490357	0.2163
	C=6	0.527118	0.315837	0.410317	0.310437	0.20134	0.653503	0.482006	0.44981	0.394103	0.327437	0.787569	0.758764	0.612352	0.491235	0.231605
	C=7	0.514345	0.338849	0.433828	0.336987	0.23506	0.746858	0.615384	0.483159	0.364545	0.331953	0.827213	0.68928	0.629753	0.509608	0.244647
	C=8	0.517242	0.343765	0.459638	0.337076	0.248655	0.727755	0.584812	0.53558	0.398559	0.305242	0.682436	0.624219	0.56038	0.488711	0.322974
m_cnv	C=2	0.683295	0.785554	0.507501	0.32195	0.0408438	0.666657	0.591857	0.479722	0.439789	0.401248	0.870814	0.537288	0.42714	0.218177	0.171955
	C=3	0.462313	0.471209	0.395604	0.203296	0.0772725	0.65799	0.505377	0.455166	0.378753	0.317009	0.778012	0.360093	0.475674	0.217381	0.0340097
	C=4	0.439245	0.450577	0.381927	0.209481	0.0929491	0.675248	0.485629	0.421481	0.322697	0.277314	0.923546	0.590508	0.492766	0.191935	0.0453083
	C=5	0.509929	0.481401	0.453686	0.306148	0.11596	0.45377	0.438912	0.396206	0.327074	0.248897	0.520729	0.553447	0.581076	0.36159	0.0710287
	C=6	0.54509	0.501457	0.447257	0.438571	0.2156	0.476007	0.383648	0.353013	0.330439	0.22001	0.699929	0.658353	0.57527	0.471511	0.119382
	C=7	0.549327	0.505749	0.459694	0.437971	0.216715	0.490595	0.365227	0.396208	0.304026	0.218243	0.648524	0.622989	0.590899	0.432578	0.201834
	C=8	0.549659	0.507824	0.451154	0.440267	0.227791	0.472554	0.463091	0.375101	0.286979	0.195708	0.750577	0.631208	0.572482	0.405833	0.245697
mi_me	C=2	0.38297	6.62e-05	0.0113174	0.0020914	0.0123358	0.684606	0.584777	0.306783	0.232734	0.142736	0.822642	0.645074	0.471121	0.110689	1.19e-05
	C=3	0.401843	0.0299884	0.0197448	0.00182778	0.0130096	0.585616	0.490921	0.287046	0.120401	0.0661953	0.562615	0.46421	0.363501	0.0737274	0.0541401
	C=4	0.392034	0.0341272	0.01961	0.0118307	0.0258698	0.636485	0.415048	0.248369	0.133135	0.0591107	0.738508	0.620675	0.336796	0.190351	0.0570917
	C=5	0.391522	0.0870225	0.0676438	0.0497319	0.0593613	0.499035	0.327957	0.237028	0.106961	0.0373644	0.684462	0.512545	0.320085	0.126689	0.0315232
	C=6	0.513431	0.144932	0.10231	0.0689415	0.0679947	0.53191	0.37088	0.178638	0.106776	0.0375108	0.589234	0.547342	0.307685	0.0940263	0.0494225
	C=7	0.520472	0.144008	0.107857	0.0715094	0.0690093	0.587014	0.408582	0.194959	0.108717	0.0329985	0.596984	0.553158	0.341852	0.151385	0.0494018
	C=8	0.511236	0.165026	0.110182	0.0752049	0.0710996	0.545957	0.351932	0.169758	0.0716004	0.0450146	0.52104	0.510649	0.288737	0.138073	0.0741249
mi_cnv	C=2	0.121361	0.0503419	0.453763	0.0240807	0.0473174	0.670236	0.480936	0.366721	0.238393	0.139308	0.804956	0.634653	0.450905	0.0885492	0.0411501
	C=3	0.109408	0.0530765	0.382712	0.0396284	0.040996	0.500041	0.406169	0.279171	0.17447	0.0696682	0.726196	0.622859	0.345097	0.0681079	0.0314627
	C=4	0.104334	0.055794	0.431489	0.0398167	0.0440299	0.433827	0.334417	0.237627	0.136379	0.0724054	0.73668	0.502781	0.314268	0.147694	0.0328432
	C=5	0.0995317	0.0556881	0.556605	0.0361595	0.0420678	0.556869	0.393276	0.237123	0.124091	0.0412528	0.690585	0.445895	0.314317	0.143896	0.0461589
	C=6	0.0989016	0.084208	0.532636	0.0400286	0.0396578	0.526809	0.352236	0.193532	0.111229	0.0381496	0.502638	0.44293	0.294403	0.115759	0.0513003
	C=7	0.11661	0.098185	0.571949	0.0427647	0.0413399	0.4276	0.352426	0.182887	0.112072	0.0322303	0.558395	0.556529	0.307515	0.131864	0.0559393
	C=8	0.114489	0.105632	0.564348	0.0385806	0.041177	0.440287	0.339034	0.195254	0.117898	0.0316838	0.524361	0.46385	0.313149	0.153593	0.0642731
me_cnv	C=2	0.0805814	0.0570715	0.0578414	0.0543012	0.0100289	0.31477	0.00056817	7.06e-05	0.0192007	0.00189663	0.902439	0.842561	0.00508265	0.00169295	0.00620448
	C=3	0.7199	0.0456698	0.0607215	0.0530068	0.0106579	0.488854	0.471537	0.426052	0.324638	0.226933	0.904432	0.858016	0.677372	0.262611	0.00540708
	C=4	0.665625	0.0735424	0.0724522	0.0520462	0.104748	0.421706	0.508305	0.378869	0.269542	0.197997	0.935815	0.863415	0.774493	0.553545	0.238848
	C=5	0.628158	0.0832203	0.0724891	0.0547851	0.122552	0.409722	0.411183	0.46048	0.341675	0.249214	0.857318	0.803226	0.759471	0.549217	0.220687
	C=6	0.697533	0.084656	0.072796	0.0572983	0.122084	0.58963	0.472308	0.409495	0.353583	0.247144	0.597087	0.582898	0.554176	0.492353	0.294722
	C=7	0.619623	0.0846265	0.0709421	0.0507487	0.151289	0.532443	0.466231	0.405205	0.300864	0.219612	0.68575	0.586168	0.554544	0.4823	0.253576
	C=8	0.65412	0.0859181	0.0706399	0.0534771	0.160775	0.495123	0.51591	0.392222	0.293259	0.215116	0.698042	0.681912	0.565043	0.485726	0.351071
m_mi_me	C=2	0.389825	0.285072	0.00277134	0.00151634	0.0116735	0.713763	0.578373	0.32953	0.263168	0.158712	0.619832	0.544123	0.277983	0.0675991	0.00949993
	C=3	0.387592	0.363267	0.0258091	0.00618567	0.00838366	0.701816	0.582791	0.361472	0.199145	0.117622	0.804191	0.611029	0.421523	0.137484	0.00331189
	C=4	0.447355	0.398355	0.0316556	0.0114781	0.0114933	0.604051	0.394443	0.268156	0.151032	0.0939067	0.736295	0.714957	0.411385	0.134717	0.0312917
	C=5	0.492281	0.43051	0.0374943	0.0155258	0.0120543	0.636965	0.426505	0.227682	0.142353	0.0584783	0.660752	0.668482	0.486595	0.126617	0.0314385
	C=6	0.508398	0.432067	0.0548242	0.0299721	0.0188236	0.684964	0.387603	0.266064	0.14734	0.0613792	0.74239	0.604309	0.481754	0.143665	0.0895008
	C=7	0.509827	0.425224	0.0611585	0.0323497	0.0219627	0.574548	0.477001	0.236255	0.128403	0.0619447	0.644229	0.542474	0.456327	0.182379	0.0805988
	C=8	0.505303	0.437226	0.0701738	0.04805	0.0315469	0.623619	0.464532	0.232853	0.115389	0.0675141	0.673559	0.543798	0.451749	0.258922	0.0719686
m_mi_cnv	C=2	0.297788	0.663465	0.515061	0.00112871	3e-05	0.693643	0.585858	0.384773	0.245408	0.144149	0.475652	0.195027	0.303714	3.86e-07	0.0128675
	C=3	0.279664	0.573774	0.288432	0.0682128	0.00641277	0.49257	0.416108	0.264829	0.191595	0.109794	0.748792	0.560006	0.381481	0.0401112	0.0409264
	C=4	0.436877	0.493244	0.271829	0.0682244	0.00710364	0.418044	0.352138	0.260329	0.17492	0.0885652	0.790803	0.648223	0.386787	0.112115	0.0203205
	C=5	0.433389	0.488285	0.290285	0.0646171	0.0173409	0.480665	0.363767	0.255817	0.135065	0.0664299	0.696521	0.617582	0.410735	0.132243	0.0534327
	C=6	0.528635	0.505416	0.382005	0.126308	0.0279825	0.414904	0.318812	0.22363	0.118549	0.0558519	0.593544	0.541374	0.503424	0.204276	0.0530105
	C=7	0.544372	0.525434	0.41973	0.150155	0.0338268	0.512426	0.402315	0.218259	0.11935	0.0574233	0.614592	0.537486	0.449371	0.23327	0.0874358
	C=8	0.521173	0.547206	0.497096	0.170064	0.0395445	0.490404	0.359474	0.227832	0.118393	0.0713562	0.556511	0.544978	0.394951	0.177663	0.11695
m_me_cnv	C=2	0.294262	0.481573	0.463676	0.000733157	0.229437	0.848147	0.671479	0.620566	0.630419	0.525868	0.0808201	0.338438	0.0210075	0.0978565	0.059173
	C=3	0.220531	0.452974	0.35502	0.0872823	0.258656	0.651752	0.521176	0.427264	0.373799	0.360717	0.842812	0.624406	0.35374	0.158026	0.0512524
	C=4	0.274186	0.362644	0.364105	0.117138	0.312687	0.495834	0.556375	0.457528	0.43315	0.308679	0.554966	0.428531	0.476491	0.330638	0.0578729
	C=5	0.448352	0.381589	0.431489	0.140798	0.293555	0.462869	0.458701	0.3888	0.399028	0.293929	0.800758	0.744037	0.607812	0.36339	0.142275
	C=6	0.462075	0.367318	0.429729	0.262062	0.294812	0.469269	0.412653	0.390669	0.360605	0.292357	0.781109	0.685796	0.637461	0.472441	0.194483
	C=7	0.633615	0.474774	0.453214	0.259589	0.394908	0.563573	0.486223	0.415465	0.375683	0.294868	0.658179	0.683055	0.579736	0.479177	0.211111
	C=8	0.654234	0.536572	0.449204	0.312665	0.414584	0.504588	0.43219	0.405155	0.329788	0.285355	0.642102	0.693227	0.608246	0.467829	0.23882
mi_me_cnv	C=2	0.557475	0.0121942	0.0339397	0.00272616	0.00524246	0.657343	0.617603	0.354928	0.23397	0.163637	0.781111	0.653996	0.312834	0.00275693	0.0407591
	C=3	0.474896	0.0388662	0.227925	0.00824976	0.00414453	0.553279	0.471201	0.321427	0.150127	0.106527	0.635626	0.510955	0.377142	0.0384169	0.0235638
	C=4	0.510414	0.0993945	0.310763	0.0142548	0.00764734	0.548076	0.353904	0.261479	0.128917	0.0591303	0.722008	0.590618	0.310989	0.108748	0.0421456
	C=5	0.6209	0.262376	0.317402	0.0158003	0.0196954	0.475093	0.376031	0.225632	0.140592	0.05471	0.642133	0.456021	0.33666	0.0962221	0.0421524
	C=6	0.62341	0.545677	0.31904	0.0186762	0.0205005	0.478376	0.36512	0.232726	0.137415	0.0459647	0.62744	0.433216	0.306371	0.132771	0.0339571
	C=7	0.604234	0.578555	0.354201	0.0453864	0.0366123	0.460332	0.385756	0.208938	0.119199	0.0520282	0.572552	0.487503	0.304826	0.099852	0.0390704
	C=8	0.598703	0.593037	0.406168	0.0562426	0.0405809	0.418303	0.35981	0.213706	0.129259	0.0474419	0.553639	0.510227	0.266817	0.113019	0.0469887
m_mi_me_cnv	C=2	0.183773	0.441482	0.119809	0.203156	1.46e-05	0.721401	0.603418	0.370105	0.254341	0.161265	0.778223	0.262081	0.479751	0.000540742	0.000732287
	C=3	0.225396	0.390007	0.171224	0.266899	0.00305402	0.490654	0.471337	0.332371	0.148719	0.114722	0.653238	0.52952	0.276374	0.0453083	0.0253372
	C=4	0.287089	0.479434	0.337151	0.258102	0.00893442	0.47315	0.370469	0.275393	0.154993	0.0299867	0.777165	0.633093	0.301808	0.10107	0.0271497
	C=5	0.405843	0.507156	0.35925	0.242105	0.0206565	0.421999	0.402169	0.244382	0.126077	0.0789355	0.690458	0.63603	0.488685	0.165591	0.0759257
	C=6	0.462204	0.529601	0.364669	0.222213	0.0245266	0.602507	0.381351	0.216378	0.143363	0.0528585	0.699004	0.629996	0.443849	0.200073	0.0760131
	C=7	0.469422	0.533418	0.428399	0.259457	0.0299836	0.465474	0.415074	0.275533	0.111597	0.0639229	0.691057	0.645447	0.528381	0.196966	0.0828762
	C=8	0.450303	0.535921	0.453604	0.284314	0.0319053	0.493604	0.349847	0.216561	0.123557	0.0465052	0.598548	0.52859	0.475515	0.26134	0.0936171
Methods		Subtype-GAN
Data Comb.	Noise Level	0.5	1	2	3	4
m_mi	C=2	0.341945	0.368168	0.339375	0.237833	0.231348
	C=3	0.521944	0.500242	0.472256	0.321146	0.259192
	C=4	0.476606	0.515413	0.467404	0.335375	0.257453
	C=5	0.567308	0.586116	0.413719	0.329712	0.23888
	C=6	0.521023	0.506788	0.393678	0.33677	0.23756
	C=7	0.556584	0.508728	0.37756	0.299806	0.220345
	C=8	0.523921	0.525186	0.414129	0.318879	0.227479
m_me	C=2	0.322938	0.314402	0.365868	0.266972	0.224202
	C=3	0.540973	0.462078	0.486332	0.388641	0.316972
	C=4	0.515905	0.45903	0.561048	0.376932	0.28986
	C=5	0.499681	0.474507	0.561754	0.356868	0.298557
	C=6	0.445513	0.462861	0.502932	0.386843	0.298506
	C=7	0.521494	0.467773	0.507035	0.434165	0.31737
	C=8	0.518832	0.43801	0.503034	0.415045	0.304282
m_cnv	C=2	0.346185	0.341012	0.289467	0.123268	0.148803
	C=3	0.532144	0.43202	0.442204	0.34101	0.234228
	C=4	0.575864	0.558195	0.49623	0.325074	0.252341
	C=5	0.622608	0.503755	0.486226	0.335423	0.232843
	C=6	0.601583	0.569568	0.528205	0.336764	0.224357
	C=7	0.546654	0.543014	0.478868	0.361467	0.252426
	C=8	0.51894	0.521467	0.453754	0.373764	0.249156
mi_me	C=2	0.31203	0.296781	0.225733	0.115049	0.0483794
	C=3	0.472341	0.381173	0.300551	0.179832	0.0698199
	C=4	0.53256	0.426938	0.303153	0.177463	0.0619624
	C=5	0.487672	0.451737	0.311649	0.181763	0.0589395
	C=6	0.487067	0.41834	0.291105	0.168195	0.0664628
	C=7	0.529818	0.434143	0.310845	0.185602	0.0738389
	C=8	0.485336	0.390212	0.270296	0.164382	0.0687653
mi_cnv	C=2	0.399986	0.239086	0.15776	0.120644	0.0626723
	C=3	0.434644	0.42798	0.249366	0.15405	0.0546328
	C=4	0.520017	0.395675	0.223832	0.145073	0.0595492
	C=5	0.628433	0.419977	0.248917	0.142572	0.0695985
	C=6	0.558148	0.459884	0.245387	0.144237	0.0653416
	C=7	0.484177	0.42444	0.257725	0.139464	0.0699075
	C=8	0.428188	0.392047	0.245	0.137933	0.0642497
me_cnv	C=2	0.425368	0.346565	0.275147	0.210204	0.225449
	C=3	0.486017	0.447744	0.474476	0.338408	0.276527
	C=4	0.571305	0.487159	0.436273	0.355303	0.302704
	C=5	0.666667	0.632697	0.438902	0.346836	0.323433
	C=6	0.590676	0.535648	0.470177	0.345778	0.301356
	C=7	0.555467	0.504379	0.427701	0.358164	0.32319
	C=8	0.486617	0.464251	0.419736	0.346631	0.283475
m_mi_me	C=2	0.328279	0.304587	0.264492	0.264177	0.185888
	C=3	0.457164	0.492336	0.505579	0.402961	0.313633
	C=4	0.497842	0.503512	0.460285	0.361338	0.314668
	C=5	0.540953	0.489032	0.410527	0.372789	0.293123
	C=6	0.506953	0.483661	0.394172	0.336382	0.274099
	C=7	0.553834	0.468649	0.430268	0.349435	0.27204
	C=8	0.527336	0.486163	0.447108	0.367009	0.275431
m_mi_cnv	C=2	0.299143	0.303802	0.276553	0.210735	0.168127
	C=3	0.475983	0.455624	0.434968	0.381418	0.259192
	C=4	0.589129	0.452534	0.459621	0.372247	0.269149
	C=5	0.617413	0.412563	0.441437	0.375797	0.255001
	C=6	0.575868	0.433842	0.485371	0.362084	0.240607
	C=7	0.519765	0.424574	0.476881	0.361891	0.243224
	C=8	0.493724	0.406183	0.430685	0.339537	0.237141
m_me_cnv	C=2	0.333302	0.243331	0.235216	0.180637	0.179263
	C=3	0.521531	0.435456	0.450783	0.360502	0.345309
	C=4	0.520117	0.414302	0.397793	0.318795	0.306526
	C=5	0.538963	0.430415	0.400714	0.31914	0.289361
	C=6	0.498575	0.407454	0.381017	0.310583	0.286279
	C=7	0.56911	0.46707	0.408497	0.31922	0.322337
	C=8	0.541816	0.436363	0.418407	0.346674	0.297857
mi_me_cnv	C=2	0.318697	0.274101	0.248559	0.118623	0.0665406
	C=3	0.489538	0.480903	0.37972	0.14378	0.0829539
	C=4	0.524827	0.46918	0.325823	0.13508	0.0823831
	C=5	0.458283	0.445982	0.326758	0.124667	0.0733471
	C=6	0.447411	0.403608	0.301657	0.136957	0.0697782
	C=7	0.452634	0.365364	0.323914	0.156377	0.0887476
	C=8	0.446745	0.390686	0.316388	0.143321	0.0815024
m_mi_me_cnv	C=2	0.325719	0.281674	0.246224	0.20411	0.118707
	C=3	0.446607	0.440382	0.376211	0.3228	0.219698
	C=4	0.443234	0.500696	0.416285	0.289043	0.196758
	C=5	0.511098	0.565181	0.355308	0.264914	0.159223
	C=6	0.502633	0.518657	0.322925	0.261749	0.146399
	C=7	0.421709	0.512022	0.383234	0.287043	0.172844
	C=8	0.459271	0.468053	0.317719	0.247962	0.156475
Dataset #2 COAD Noise Datasets NMI
Methods		iClusterBayes					LRAcluster					SNF
Data Comb.	Noise Level	0.5	1	2	3	4	0.5	1	2	3	4	0.5	1	2	3	4
m_mi	C=2	0.701374	0.784264	0.557531	0.445261	0.469956	0.352218	0.890928	0.735602	0.149559	0.508821	0.893834	0.735333	0.586428	0.494016	0.269069
	C=3	0.799444	0.932228	0.691406	0.669468	0.602771	0.982257	0.88769	0.862915	0.808334	0.646634	0.826649	0.823523	0.668983	0.573483	0.342606
	C=4	0.468518	0.641442	0.406442	0.553515	0.363762	0.93661	0.892903	0.746821	0.749893	0.63321	0.847377	0.60478	0.433991	0.389674	0.234991
	C=5	0.603378	0.339802	0.358048	0.250526	0.186643	0.926565	0.907007	0.804307	0.730046	0.577999	0.854072	0.707534	0.482439	0.368354	0.237193
	C=6	0.418469	0.226851	0.171608	0.3072	0.290255	0.741905	0.867779	0.755907	0.733262	0.535929	0.790202	0.703477	0.498915	0.389087	0.194241
	C=7	0.471923	0.148534	0.123619	0.157828	0.166469	0.93084	0.755548	0.664037	0.701018	0.584191	0.660984	0.546305	0.439266	0.303878	0.199719
	C=8	0.42317	0.140336	0.103431	0.271691	0.186909	0.910566	0.824043	0.749001	0.621444	0.57413	0.69269	0.571868	0.513407	0.319796	0.185435
m_me	C=2	0.93913	0.852724	0.803913	0.797805	0.735873	0.946272	0.946272	0.876936	0.810641	0.716768	0.917005	0.805062	0.721723	0.671187	0.634659
	C=3	0.540804	0.669894	0.538643	0.652364	0.622141	0.94461	0.920595	0.814109	0.736597	0.69631	0.897835	0.802848	0.727019	0.622978	0.523683
	C=4	0.574254	0.454284	0.425055	0.430095	0.425534	0.927853	0.856481	0.858963	0.774629	0.680391	0.855675	0.837	0.603176	0.497022	0.451595
	C=5	0.588065	0.105181	0.32205	0.268422	0.418097	0.956028	0.948081	0.788637	0.786477	0.653251	0.943955	0.827979	0.642179	0.487205	0.419357
	C=6	0.529844	0.333383	0.234601	0.253554	0.320629	0.903801	0.887678	0.729684	0.748314	0.65866	0.938838	0.844012	0.705412	0.596754	0.422445
	C=7	0.303215	0.117192	0.086	0.191261	0.267022	0.752685	0.833313	0.829778	0.750679	0.725959	0.814629	0.787317	0.663577	0.487878	0.376167
	C=8	0.536892	0.118642	0.122884	0.199126	0.1894	1	0.930499	0.720853	0.806042	0.717716	0.899838	0.864563	0.708257	0.518999	0.37803
m_cnv	C=2	1	0.891634	0.856737	0.708339	0.642952	0.947572	0.791406	0.86216	0.740213	0.678198	0.945263	0.924318	0.749668	0.632679	0.634152
	C=3	0.596448	0.762978	0.646254	0.477114	0.562019	0.851967	0.890414	0.757987	0.708519	0.70078	0.912236	0.836461	0.705651	0.609584	0.463695
	C=4	0.805725	0.820663	0.674991	0.616367	0.534373	0.943348	0.94853	0.72732	0.589066	0.447116	0.683156	0.549442	0.488478	0.456457	0.373767
	C=5	0.597908	0.581835	0.50453	0.508813	0.461015	0.987639	0.930141	0.762488	0.671205	0.520155	0.624463	0.586888	0.517719	0.505822	0.384816
	C=6	0.532492	0.411002	0.39038	0.46155	0.33391	0.93245	0.96407	0.8363	0.650558	0.505376	0.780439	0.638089	0.517024	0.453534	0.38822
	C=7	0.455067	0.296747	0.345491	0.323175	0.291956	0.933072	0.926771	0.698497	0.603197	0.516606	0.743367	0.610873	0.532204	0.44202	0.34406
	C=8	0.38592	0.22435	0.225804	0.303417	0.241969	0.933316	0.889198	0.734985	0.583545	0.538006	0.679932	0.595933	0.483663	0.412043	0.345481
mi_me	C=2	0.829373	0.772782	0.707679	0.663522	0.705381	0.821621	0.738651	0.816911	0.394661	0.690468	0.659433	0.659433	0.462477	0.412264	0.271938
	C=3	0.863229	0.880371	0.678383	0.663912	0.624248	0.946797	0.903419	0.824324	0.732052	0.593202	0.873871	0.737048	0.393146	0.366056	0.325286
	C=4	0.482185	0.276051	0.261464	0.284173	0.392077	0.844245	0.649548	0.801583	0.449609	0.559051	0.892092	0.633081	0.369418	0.332786	0.321758
	C=5	0.683311	0.218807	0.144872	0.316906	0.310745	0.988492	0.895168	0.810323	0.752139	0.657645	0.70043	0.570896	0.476922	0.338555	0.20568
	C=6	0.573062	0.0949463	0.156233	0.203119	0.237236	1	0.943992	0.80967	0.764834	0.580856	0.843258	0.683973	0.564176	0.348022	0.236746
	C=7	0.515602	0.0957635	0.0761392	0.10234	0.210786	0.958864	0.873056	0.81761	0.734227	0.617728	0.714754	0.651371	0.481021	0.308656	0.238688
	C=8	0.625543	0.0827761	0.106941	0.153078	0.131917	0.766164	0.732535	0.67118	0.653919	0.649378	0.659295	0.610078	0.475114	0.261294	0.270735
mi_cnv	C=2	0.965454	0.285847	0.273523	0.00210708	0.00641563	0.896089	0.91559	0.659006	0.800446	0.709954	0.869618	0.688898	0.476457	0.322437	0.192875
	C=3	0.886796	0.721245	0.755806	0.624427	0.564628	0.945381	0.90784	0.801937	0.680788	0.617451	0.695833	0.575258	0.441175	0.377581	0.248768
	C=4	0.621776	0.468165	0.453466	0.381918	0.395389	0.944073	0.798254	0.61446	0.682278	0.656196	0.778812	0.526087	0.418153	0.356687	0.284577
	C=5	0.565327	0.228233	0.316239	0.272148	0.369	0.927066	0.681221	0.680234	0.707145	0.602034	0.693416	0.665148	0.405905	0.32713	0.266271
	C=6	0.542169	0.235959	0.239708	0.263126	0.394821	0.890166	0.898289	0.779608	0.673001	0.63273	0.618991	0.552138	0.428105	0.314536	0.212184
	C=7	0.637101	0.190453	0.191786	0.279779	0.22395	0.898249	0.85222	0.668156	0.702551	0.623863	0.597832	0.556157	0.440265	0.315628	0.180615
	C=8	0.379617	0.170047	0.203985	0.262635	0.233462	0.942493	0.902981	0.707824	0.79153	0.629961	0.560705	0.568605	0.454959	0.31941	0.229993
me_cnv	C=2	0.891584	0.875163	0.768093	0.696256	0.755179	0.859686	0.861993	0.818243	0.727353	0.707094	0.904737	0.784703	0.69559	0.593781	0.511241
	C=3	0.429032	0.514895	0.313395	0.324971	0.392864	0.877068	0.842996	0.732702	0.600018	0.520546	0.861824	0.839344	0.728853	0.597673	0.521328
	C=4	0.477658	0.463656	0.395505	0.358991	0.409421	0.880042	0.861054	0.766861	0.708341	0.50792	0.495585	0.467121	0.399097	0.385852	0.367821
	C=5	0.573679	0.494834	0.494375	0.46167	0.43029	0.913768	0.899852	0.797543	0.671342	0.604064	0.633868	0.556457	0.474708	0.461448	0.353012
	C=6	0.440398	0.243619	0.303398	0.338829	0.317177	0.941003	0.907071	0.83105	0.794005	0.618457	0.586058	0.540928	0.498807	0.443955	0.314263
	C=7	0.436502	0.195299	0.339945	0.361799	0.408942	0.890038	0.916545	0.786525	0.695192	0.665384	0.792251	0.753509	0.650418	0.430819	0.364557
	C=8	0.396404	0.164833	0.146586	0.28874	0.173493	0.871201	0.752072	0.751051	0.660295	0.681302	0.779127	0.630598	0.59846	0.462517	0.361888
m_mi_me	C=2	0.946176	0.915874	0.859282	0.782281	0.722833	0.925673	0.906675	0.81303	0.783041	0.703291	0.466166	0.631828	0.615581	0.385159	0.442763
	C=3	0.917178	0.553117	0.826992	0.69363	0.585133	0.785033	0.819862	0.862275	0.785293	0.687121	0.675379	0.837739	0.649613	0.568866	0.46047
	C=4	0.589032	0.475146	0.425214	0.404709	0.360138	0.876166	0.89983	0.877961	0.78393	0.455812	0.855015	0.698705	0.475927	0.413165	0.357023
	C=5	0.389669	0.293331	0.248763	0.40469	0.320927	0.847673	0.886579	0.833333	0.789839	0.694846	0.93615	0.800268	0.587912	0.453055	0.323489
	C=6	0.442451	0.161803	0.144975	0.339948	0.268495	0.934033	0.831395	0.75338	0.729652	0.670316	0.734735	0.676595	0.563331	0.458551	0.32031
	C=7	0.404672	0.10814	0.111312	0.302705	0.161378	0.901492	0.900875	0.811383	0.762259	0.728173	0.774093	0.683241	0.565881	0.402948	0.282298
	C=8	0.180277	0.0790533	0.129263	0.23642	0.201516	0.977049	0.878189	0.716	0.768251	0.728596	0.772557	0.656216	0.588288	0.435772	0.258379
m_mi_cnv	C=2	0.891584	0.859924	0.81956	0.682142	0.628773	0.970351	0.875302	0.801219	0.745981	0.65026	0.92449	0.840247	0.768313	0.551802	0.544833
	C=3	0.792748	0.398383	0.715466	0.648625	0.519223	0.897008	0.92017	0.512581	0.747934	0.443814	0.672227	0.653557	0.601388	0.507569	0.375334
	C=4	0.740828	0.816702	0.690357	0.711208	0.528859	0.930641	0.784343	0.724058	0.716272	0.628299	0.644192	0.582208	0.460379	0.418827	0.362476
	C=5	0.807853	0.585549	0.573043	0.536937	0.490353	0.942888	0.770971	0.731333	0.676939	0.566062	0.771388	0.676938	0.550037	0.433752	0.36016
	C=6	0.498594	0.407719	0.329907	0.384293	0.346644	0.954446	0.698083	0.662017	0.585948	0.663955	0.670921	0.606986	0.540258	0.475489	0.333597
	C=7	0.500204	0.390228	0.325268	0.395437	0.3391	0.942307	0.91675	0.77962	0.571357	0.617963	0.662247	0.648645	0.546466	0.398647	0.247564
	C=8	0.474274	0.310699	0.264808	0.308688	0.240505	0.889408	0.891082	0.720461	0.65014	0.552907	0.622303	0.642425	0.517975	0.358736	0.32037
m_me_cnv	C=2	0.843704	0.815578	0.799833	0.786068	0.614012	0.890371	0.946844	0.81565	0.798171	0.764862	0.888734	0.894741	0.747262	0.711037	0.657373
	C=3	0.69623	0.533816	0.482259	0.506668	0.509473	0.939665	0.919159	0.77015	0.617934	0.62218	0.901864	0.779031	0.779718	0.58902	0.596104
	C=4	0.805001	0.490685	0.466776	0.564374	0.502673	0.481192	0.973402	0.524083	0.479497	0.443301	0.828657	0.75341	0.698201	0.551751	0.579534
	C=5	0.553788	0.487848	0.361702	0.510257	0.512851	0.632009	0.740612	0.605709	0.650646	0.562266	0.787036	0.767697	0.64852	0.508893	0.415085
	C=6	0.526764	0.336006	0.36434	0.420748	0.366906	0.925439	0.943139	0.8317	0.775712	0.706572	0.668215	0.615114	0.557009	0.477233	0.396258
	C=7	0.372241	0.0858494	0.24799	0.29541	0.332156	0.826624	0.84808	0.838788	0.806279	0.704963	0.805771	0.753509	0.667705	0.493596	0.382244
	C=8	0.293494	0.268442	0.210518	0.223154	0.322779	0.905404	0.896071	0.869511	0.799029	0.768954	0.740537	0.701802	0.61973	0.511716	0.368209
mi_me_cnv	C=2	0.947556	0.89781	0.755262	0.749906	0.693275	0.875174	0.908776	0.836588	0.703866	0.722119	0.885437	0.795265	0.757839	0.559783	0.559529
	C=3	0.396779	0.405217	0.456511	0.531076	0.4982	0.899177	0.859388	0.727382	0.621657	0.53141	0.788102	0.442772	0.503699	0.484423	0.282982
	C=4	0.43912	0.396843	0.46807	0.450545	0.394516	0.901679	0.868386	0.683843	0.741068	0.524143	0.765832	0.740587	0.545876	0.552639	0.400805
	C=5	0.537674	0.462579	0.453149	0.487248	0.492809	0.947403	0.939337	0.796317	0.706332	0.630329	0.473966	0.507692	0.416174	0.376752	0.284915
	C=6	0.427277	0.317031	0.362054	0.364689	0.329538	0.954937	0.937512	0.801526	0.742733	0.613074	0.647693	0.601308	0.471878	0.416253	0.300606
	C=7	0.409167	0.240127	0.285006	0.251262	0.299382	0.931567	0.941875	0.786585	0.705158	0.626572	0.666115	0.691015	0.507225	0.378728	0.29593
	C=8	0.330494	0.181152	0.203577	0.265464	0.292943	0.880726	0.764579	0.713465	0.660749	0.639291	0.646573	0.563164	0.451741	0.376931	0.27656
m_mi_me_cnv	C=2	0.947148	0.829184	0.777046	0.78583	0.637633	0.907761	0.946844	0.834154	0.798171	0.782254	0.849167	0.840583	0.693454	0.607648	0.639224
	C=3	0.82389	0.724157	0.656455	0.516526	0.603136	0.94629	0.962135	0.926077	0.65586	0.600895	0.834392	0.706412	0.659702	0.561582	0.530412
	C=4	0.428127	0.433437	0.450585	0.403973	0.405346	0.963578	0.963533	0.700199	0.649402	0.428873	0.828244	0.803235	0.621042	0.59373	0.410748
	C=5	0.588515	0.53105	0.538992	0.517894	0.431884	0.944575	0.839987	0.798644	0.782703	0.652079	0.733789	0.771137	0.581993	0.561858	0.363348
	C=6	0.440116	0.308395	0.321512	0.383708	0.354956	0.95454	0.86062	0.846431	0.797894	0.576831	0.691787	0.673105	0.517367	0.46033	0.338902
	C=7	0.327164	0.270627	0.218092	0.422946	0.256983	0.941542	0.88231	0.859698	0.828271	0.697585	0.71436	0.763581	0.558947	0.405085	0.355579
	C=8	0.32519	0.152697	0.158885	0.317539	0.268958	0.953808	0.921883	0.91117	0.825763	0.684127	0.681093	0.632967	0.567997	0.377602	0.296468
Methods		PFA					PINS					NEMO
Data Comb.	Noise Level	0.5	1	2	3	4	0.5	1	2	3	4	0.5	1	2	3	4
m_mi	C=2	0.00110912	0.00151203	0.00920783	0.000265502	6.92265e-05	0.711326	0.471058	0.419925	0.206032	0.0537155	0.878582	0.764798	0.679091	0.539712	0.172525
	C=3	0.00876169	0.00309123	0.0103432	0.00113713	0.00449325						0.877334	0.873602	0.720456	0.614573	0.425763
	C=4	0.0212634	0.00731942	0.013519	0.0309839	0.0113236						0.838561	0.713133	0.430385	0.405667	0.273286
	C=5	0.0239595	0.0165661	0.0279047	0.013906	0.0321048						0.92017	0.78627	0.624846	0.343296	0.279891
	C=6	0.0374468	0.0199681	0.0320511	0.0200311	0.0305098						0.882022	0.769246	0.547062	0.431671	0.219485
	C=7	0.0401841	0.0291784	0.0602918	0.0346586	0.0367125						0.680374	0.60045	0.436771	0.407585	0.226596
	C=8	0.0554666	0.0379446	0.0640913	0.0351968	0.0551481						0.696879	0.660087	0.436311	0.352252	0.186106
m_me	C=2	0.00988292	0.000656947	0.00027938	0.00207273	4.06726e-06	0.925282	0.50472	0.598629	0.509534	0.397749	0.877481	0.895841	0.785845	0.669844	0.62158
	C=3	0.0359758	0.0074772	0.0140677	0.00734351	0.0116889						0.899839	0.935469	0.759983	0.676023	0.565029
	C=4	0.123143	0.0264784	0.0119767	0.0162238	0.0196563						0.875194	0.854498	0.696944	0.47944	0.447895
	C=5	0.0769441	0.0173058	0.016988	0.0242169	0.0191757						0.914844	0.786092	0.55567	0.477856	0.402822
	C=6	0.0867795	0.0457182	0.0221916	0.0311028	0.0329871						0.900938	0.841038	0.69142	0.504712	0.429623
	C=7	0.0967597	0.037422	0.0492252	0.0441797	0.0320172						0.835035	0.707097	0.645259	0.515903	0.394524
	C=8	0.113682	0.0447819	0.0353311	0.0424821	0.048462						0.789389	0.735974	0.61251	0.504874	0.412081
m_cnv	C=2	0.011486	0.00944889	0.000160047	8.4152e-05	0.00465242	0.644556	0.573507	0.270858	0.0375492	0.043017	0.870469	0.812699	0.732437	0.580483	0.579161
	C=3	0.0722582	0.0354916	0.0102681	0.00868738	0.0225598						0.864875	0.803541	0.608721	0.625936	0.495356
	C=4	0.0779744	0.028056	0.0198326	0.0163389	0.0179445						0.871593	0.830179	0.678706	0.602543	0.500352
	C=5	0.117798	0.0223121	0.0227825	0.0232891	0.012877						0.667341	0.605131	0.579919	0.525771	0.462974
	C=6	0.173273	0.0412937	0.0354291	0.0345654	0.0448187						0.623465	0.639385	0.594519	0.484355	0.478083
	C=7	0.173197	0.0462048	0.0352505	0.0431649	0.0418406						0.642098	0.621702	0.529372	0.45959	0.43937
	C=8	0.0886621	0.0738707	0.0476423	0.0635032	0.0629313						0.741801	0.627298	0.558309	0.455158	0.395882
mi_me	C=2	0.000205964	0.00271214	1.47077e-05	7.65574e-05	0.00654228	0.82217	0.488732	0.302867	0.267325	0.194505	0.802198	0.701605	0.548216	0.275319	0.279728
	C=3	0.00864152	0.0116253	0.0013219	0.00326945	0.0118						0.878442	0.764769	0.555155	0.489289	0.39191
	C=4	0.0177819	0.0179161	0.0192586	0.0063697	0.00431909						0.889136	0.563135	0.478779	0.358948	0.322329
	C=5	0.0511554	0.021938	0.0202755	0.015125	0.00861196						0.835251	0.705295	0.478423	0.394354	0.311698
	C=6	0.0512225	0.0281111	0.0265509	0.0195719	0.0139326						0.763166	0.703498	0.539675	0.40913	0.291072
	C=7	0.0515997	0.037364	0.0285466	0.0297932	0.0318701						0.775031	0.66087	0.486554	0.32923	0.320253
	C=8	0.0628739	0.0396259	0.0388406	0.0373576	0.0378861						0.667926	0.599607	0.488394	0.323392	0.363146
mi_cnv	C=2	0.00788378	0.000371636	0.00356093	0.000765592	1.01469e-05	0.654605	0.513418	0.0406861	0.414384	0.345429	0.731999	0.651799	0.498293	0.33274	0.162273
	C=3	0.0253812	0.00384126	0.00411297	0.008785	0.00624552						0.716252	0.597933	0.298363	0.305132	0.249362
	C=4	0.0297526	0.00701007	0.00992312	0.0167584	0.013374						0.428755	0.429245	0.3513	0.240939	0.181659
	C=5	0.0516214	0.00938909	0.0091924	0.0283029	0.0302401						0.725305	0.530516	0.438108	0.351375	0.260952
	C=6	0.0471468	0.0294808	0.0231395	0.0305298	0.0249149						0.731221	0.52117	0.390366	0.306636	0.274567
	C=7	0.0829265	0.0384004	0.045355	0.0338802	0.0427131						0.688865	0.596652	0.412038	0.318674	0.200226
	C=8	0.089143	0.0528024	0.0493592	0.0397109	0.0525655						0.615036	0.490511	0.462584	0.309025	0.242737
me_cnv	C=2	0.00128949	0.00596285	0.00977501	0.00631833	0.0054763	0.725493	0.140763	0.123641	0.244701	0.021709	0.870972	0.717515	0.687396	0.571754	0.487578
	C=3	0.162765	0.0147943	0.016607	0.016018	0.0137628						0.814601	0.759027	0.683694	0.56989	0.522868
	C=4	0.0923006	0.0185755	0.00923825	0.0185716	0.0161686						0.481428	0.491544	0.396088	0.374624	0.359272
	C=5	0.126507	0.0200508	0.0187895	0.0252633	0.0218049						0.646828	0.657273	0.57081	0.459473	0.376706
	C=6	0.10324	0.0260513	0.0370869	0.0404782	0.0344064						0.576092	0.51931	0.521073	0.406029	0.488418
	C=7	0.14479	0.0389758	0.0442614	0.0525018	0.0358597						0.736923	0.721415	0.488315	0.514007	0.41672
	C=8	0.128644	0.0647723	0.0475946	0.0637868	0.0455751						0.646822	0.629315	0.532436	0.427077	0.379525
m_mi_me	C=2	0.0355484	0.00578182	0.000856782	0.00222724	0.00645227	0.639736	0.318552	0.277433	0.315337	0.184185	0.542786	0.73239	0.477899	0.440668	0.435803
	C=3	0.00551404	0.0219955	0.00884654	0.00323233	0.00734572						0.563585	0.764367	0.779934	0.639972	0.5032
	C=4	0.0354696	0.0106466	0.00851964	0.00544365	0.0122863						0.820335	0.635196	0.455994	0.397003	0.40476
	C=5	0.0317142	0.0206178	0.0135911	0.021412	0.0208525						0.955448	0.789987	0.635409	0.487098	0.363138
	C=6	0.107692	0.0259703	0.0324799	0.0224631	0.0250705						0.812281	0.738923	0.576572	0.534414	0.348369
	C=7	0.0875816	0.0351514	0.0361005	0.0345038	0.0325519						0.614309	0.629642	0.536434	0.464481	0.339847
	C=8	0.0641739	0.0448444	0.0367162	0.0442069	0.041259						0.680485	0.646308	0.558052	0.428027	0.311173
m_mi_cnv	C=2	0.00584607	0.0161078	0.0132414	0.00257332	0.00182307	0.423061	0.254041	0.0386277	0.26028	0.176642	0.894534	0.841535	0.713845	0.598418	0.605076
	C=3	0.0224375	0.0130571	0.0190472	0.00431936	0.00592776						0.856181	0.818885	0.678832	0.548303	0.46124
	C=4	0.0679352	0.0209589	0.0168648	0.0130688	0.0216935						0.703051	0.719951	0.436609	0.398811	0.375282
	C=5	0.0873159	0.0356387	0.0184721	0.0180169	0.0283185						0.6697	0.591178	0.511324	0.502825	0.414231
	C=6	0.0672372	0.0323834	0.0342774	0.0297298	0.0259064						0.772626	0.727819	0.524516	0.457614	0.34823
	C=7	0.0760667	0.0350305	0.0467788	0.0324437	0.0612477						0.829896	0.689822	0.512668	0.500117	0.365932
	C=8	0.116665	0.0729263	0.0555412	0.0438195	0.0462135						0.828399	0.708508	0.451804	0.431917	0.346855
m_me_cnv	C=2	0.0751479	0.00382981	0.000180431	0.000300977	9.52883e-05	0.938988	0.153946	0.31049	0.134844	0.11924	0.91572	0.827857	0.734418	0.628767	0.71159
	C=3	0.0556954	0.00711348	0.0194396	0.00467089	0.00674396						0.684575	0.656935	0.462748	0.395668	0.314562
	C=4	0.0907689	0.019291	0.0122746	0.00531953	0.0138115						0.867613	0.752892	0.488534	0.599105	0.605155
	C=5	0.123833	0.014415	0.018782	0.0201067	0.0306153						0.830869	0.817006	0.668949	0.489399	0.484392
	C=6	0.193415	0.0288161	0.0466632	0.0269386	0.0388769						0.848515	0.765972	0.657413	0.521762	0.506553
	C=7	0.13557	0.0297237	0.0390228	0.0463942	0.0475177						0.689077	0.653116	0.539073	0.45311	0.425993
	C=8	0.165773	0.0254736	0.0473759	0.0555044	0.0544113						0.747901	0.633342	0.605443	0.513051	0.440398
mi_me_cnv	C=2	0.00120291	0.0128673	1.70623e-05	0.00110448	0.00137188	0.505458	0.18557	0.0712022	0.114354	0.173216	0.937607	0.870127	0.67569	0.632317	0.513029
	C=3	0.0926893	0.0196247	0.0104215	0.00509009	0.0112575						0.898329	0.787062	0.461713	0.37734	0.238338
	C=4	0.129623	0.0449644	0.0109971	0.00859404	0.0129492						0.544945	0.745022	0.617263	0.534355	0.424843
	C=5	0.094559	0.0223276	0.0198265	0.0258001	0.0353621						0.471953	0.559588	0.441106	0.434582	0.360885
	C=6	0.122435	0.0374496	0.0273781	0.0349499	0.0417825						0.760851	0.695058	0.503065	0.402197	0.387343
	C=7	0.129686	0.0587968	0.0412835	0.0345494	0.0382276						0.76617	0.633036	0.511447	0.439846	0.328838
	C=8	0.133321	0.0627183	0.0542873	0.0493542	0.039151						0.774897	0.639648	0.456922	0.385553	0.344471
m_mi_me_cnv	C=2	0.0191232	0.00297942	0.000613299	0.000761883	0.00171299	0.881397	0.154543	0.302742	0.328448	0.150997	0.91522	0.888543	0.687845	0.646552	0.646552
	C=3	0.101911	0.0160174	0.00559235	0.00341276	0.00609383						0.570579	0.810645	0.725894	0.488076	0.476562
	C=4	0.0965359	0.0396006	0.0195654	0.0059248	0.0121409						0.652719	0.672081	0.435269	0.547605	0.467192
	C=5	0.0659437	0.0160664	0.0234446	0.0204278	0.0230747						0.587416	0.748035	0.623746	0.44255	0.383175
	C=6	0.122672	0.0529238	0.0282763	0.0385182	0.0407722						0.850922	0.675731	0.568187	0.522371	0.380608
	C=7	0.121862	0.0532778	0.0662381	0.0453942	0.0429758						0.820812	0.736445	0.614765	0.547475	0.389003
	C=8	0.132943	0.0546506	0.0669475	0.0686832	0.0685959						0.649413	0.628599	0.528239	0.492072	0.41168
Methods		moCluster					CIMLR					multiNMF
Data Comb.	Noise Level	0.5	1	2	3	4	0.5	1	2	3	4	0.5	1	2	3	4
m_mi	C=2	0.0964365	0.134367	0.000237443	0.00327544	1.96e-05	0.81739	0.474591	0.264152	0.230315	0.0175553	0.81956	0.690259	0.47118	0.0865975	0.000208657
	C=3	0.211989	0.434813	0.0732485	0.0187663	0.0205486	0.495272	0.345141	0.248501	0.145247	0.0470806	0.873294	0.50102	0.359551	0.146982	0.0828732
	C=4	0.278657	0.459171	0.125028	0.0197522	0.0377251	0.393417	0.27929	0.258997	0.10951	0.0317927	0.727313	0.628911	0.37365	0.233561	0.0965223
	C=5	0.378053	0.4661	0.117384	0.0455549	0.0404374	0.533452	0.307757	0.209769	0.082628	0.0541864	0.66244	0.533505	0.383442	0.14248	0.0754787
	C=6	0.428407	0.501165	0.131667	0.0626687	0.0450295	0.426721	0.359678	0.202254	0.0896955	0.051349	0.59471	0.561014	0.38338	0.20177	0.0907944
	C=7	0.484071	0.498526	0.135768	0.0809977	0.0482691	0.528131	0.354709	0.204186	0.100004	0.0762095	0.51098	0.472059	0.317033	0.213706	0.111984
	C=8	0.502577	0.541102	0.140228	0.093296	0.0631365	0.60819	0.388425	0.240394	0.0921159	0.0735231	0.64806	0.615556	0.389364	0.238546	0.136768
m_me	C=2	0.301692	0.547903	0.214465	0.273853	0.243064	0.854186	0.816375	0.770022	0.595073	0.373372	0.675747	0.529957	0.0389269	0.136801	0.0721009
	C=3	0.347094	0.525802	0.305586	0.276955	0.174492	0.940826	0.894896	0.63935	0.563064	0.363548	0.950315	0.784366	0.282228	0.208959	0.0808658
	C=4	0.409802	0.600441	0.356432	0.335726	0.27541	0.681331	0.585596	0.404301	0.458839	0.326883	0.91572	0.918209	0.689772	0.263888	0.0640557
	C=5	0.458002	0.585026	0.380937	0.33535	0.296585	0.853725	0.629042	0.589705	0.452459	0.301651	0.899539	0.637548	0.762231	0.374709	0.10275
	C=6	0.572159	0.618859	0.435321	0.364606	0.329499	0.697725	0.651526	0.547954	0.422675	0.266245	0.898663	0.806582	0.748679	0.524289	0.169214
	C=7	0.594536	0.653964	0.464618	0.381887	0.336265	0.862573	0.683932	0.602242	0.405538	0.296557	0.691567	0.631682	0.697587	0.543507	0.204542
	C=8	0.614853	0.66324	0.509777	0.405225	0.363029	0.845394	0.694739	0.626411	0.420306	0.322343	0.677538	0.629035	0.558446	0.506148	0.345423
m_cnv	C=2	0.000694851	5.97e-06	0.0119388	0.000661759	0.00484306	0.639722	0.432893	0.451422	0.363864	0.261157	0.23732	0.402452	0.337602	0.0206146	0.00214525
	C=3	0.00786892	0.0125253	0.0188611	0.0104583	0.0154065	0.455926	0.374904	0.36562	0.326622	0.214136	0.373727	0.806747	0.321096	0.0806268	0.031238
	C=4	0.0192232	0.0323476	0.0216188	0.00783598	0.0138103	0.598047	0.503792	0.448869	0.417086	0.283309	0.877921	0.848441	0.560349	0.0383253	0.0275015
	C=5	0.0460127	0.127563	0.107007	0.0471749	0.0652055	0.512742	0.448853	0.371998	0.323115	0.242964	0.851405	0.804026	0.671299	0.266152	0.0528073
	C=6	0.0688741	0.139221	0.119557	0.055915	0.0724934	0.529238	0.50892	0.41727	0.359006	0.285607	0.630871	0.713763	0.649757	0.423278	0.115632
	C=7	0.0732631	0.152826	0.123685	0.0611642	0.076891	0.6379	0.506165	0.464564	0.404133	0.22467	0.609127	0.606495	0.60818	0.38903	0.149712
	C=8	0.15514	0.203479	0.168933	0.0816154	0.123308	0.649038	0.486978	0.442334	0.341325	0.22956	0.614261	0.680376	0.523112	0.456759	0.204461
mi_me	C=2	0.0954233	0.00431574	0.00740147	0.0498411	0.000753652	0.549114	0.516258	0.28208	0.204305	0.0502352	0.85962	0.664061	0.458584	0.0323725	0.0370525
	C=3	0.136787	0.123091	0.0394629	0.0587545	0.0130873	0.472429	0.355292	0.208891	0.149324	0.0484779	0.376623	0.442048	0.31393	0.0993937	0.0867252
	C=4	0.283082	0.153487	0.0740514	0.102811	0.0238824	0.488994	0.348841	0.28311	0.108634	0.037981	0.425633	0.423441	0.279554	0.158121	0.12795
	C=5	0.297514	0.226907	0.0827408	0.102761	0.0326152	0.449606	0.311096	0.152519	0.0662884	0.057496	0.528499	0.421753	0.287568	0.132428	0.0919417
	C=6	0.335555	0.241066	0.113886	0.119863	0.0405333	0.449939	0.352918	0.240979	0.107255	0.0612247	0.593719	0.430278	0.260448	0.136871	0.0685748
	C=7	0.354652	0.295058	0.119245	0.131612	0.0517745	0.587477	0.344784	0.225142	0.0919055	0.0743236	0.500552	0.408659	0.29754	0.164007	0.107103
	C=8	0.389883	0.344065	0.140537	0.131035	0.0668094	0.608538	0.381394	0.19721	0.0840875	0.0800883	0.493252	0.393895	0.261519	0.154157	0.129188
mi_cnv	C=2	0.522558	0.00270752	0.047304	0.0107782	0.0569265	0.0852955	0.0296174	0.0540423	0.00630248	0.00308233	0.859545	0.65958	0.475969	0.161127	0.141615
	C=3	0.384297	0.0271789	0.106375	0.0497505	0.0922544	0.440948	0.35109	0.200267	0.110492	0.0504412	0.550296	0.396689	0.325484	0.139864	0.0718259
	C=4	0.529194	0.0379097	0.0980542	0.0638285	0.0848211	0.390439	0.33903	0.180706	0.0879465	0.02615	0.405992	0.515375	0.246775	0.14804	0.0600378
	C=5	0.535369	0.0417095	0.0934919	0.0772698	0.0923245	0.417529	0.337348	0.167492	0.090347	0.022008	0.559564	0.443647	0.277871	0.153457	0.0825769
	C=6	0.583902	0.0495142	0.130243	0.0758884	0.0930317	0.472007	0.341682	0.185556	0.0946328	0.0472518	0.526122	0.443691	0.220656	0.158683	0.0946361
	C=7	0.57139	0.0593472	0.144902	0.0790043	0.097544	0.538903	0.362626	0.182023	0.0897774	0.04433	0.547733	0.543138	0.280807	0.156363	0.0728635
	C=8	0.60681	0.0709868	0.148838	0.0947974	0.105303	0.447965	0.381182	0.182765	0.0981073	0.0705691	0.478025	0.365425	0.260992	0.140058	0.105747
me_cnv	C=2	0.204958	0.839002	0.0292815	0.0573444	0.059862	0.563716	0.465987	0.451033	0.281899	0.268876	0.916559	0.800381	0.0252977	0.0077207	0.00748946
	C=3	0.76309	0.750822	0.0472569	0.0776836	0.0513757	0.455997	0.465273	0.349164	0.338976	0.249619	0.913671	0.543851	0.544057	0.0204091	0.00520643
	C=4	0.784934	0.625243	0.0541822	0.0708306	0.0651376	0.52877	0.451153	0.427374	0.369434	0.218814	0.615571	0.736323	0.607432	0.264155	0.0619006
	C=5	0.690505	0.599819	0.0689427	0.0879445	0.0823814	0.530778	0.477502	0.395935	0.219948	0.227917	0.845516	0.78023	0.426607	0.305284	0.0857454
	C=6	0.686638	0.61247	0.120979	0.0936156	0.0889229	0.594787	0.403099	0.392389	0.258374	0.246124	0.742816	0.843683	0.574467	0.349546	0.0749021
	C=7	0.750789	0.630864	0.135102	0.0890127	0.110912	0.565006	0.489676	0.435304	0.329163	0.237966	0.898762	0.605034	0.498464	0.362699	0.218302
	C=8	0.761075	0.634502	0.155883	0.114415	0.143696	0.605931	0.48635	0.426552	0.295219	0.218341	0.714751	0.697196	0.483881	0.431435	0.160742
m_mi_me	C=2	0.492586	0.0801689	0.00697034	0.000151917	0.00010751	0.733861	0.426821	0.354827	0.189585	0.00166237	0.793357	0.663312	0.407461	0.186342	0.0275754
	C=3	0.361622	0.412973	0.137132	0.0306722	0.00496157	0.3316	0.241041	0.287462	0.142601	0.0549398	0.869655	0.361161	0.241528	0.0361951	0.0497954
	C=4	0.563943	0.40758	0.114719	0.0485083	0.0274368	0.570194	0.388674	0.302075	0.0671923	0.0468854	0.816924	0.700723	0.288594	0.226335	0.116716
	C=5	0.562134	0.421168	0.159764	0.056632	0.0340778	0.501967	0.351908	0.247374	0.0731502	0.0675568	0.625796	0.593199	0.359293	0.180612	0.0637068
	C=6	0.537813	0.413888	0.159442	0.0659616	0.0430176	0.510692	0.451289	0.272594	0.0716653	0.0609069	0.725406	0.675419	0.41744	0.202186	0.117145
	C=7	0.515293	0.455259	0.158152	0.0750523	0.0540955	0.609503	0.476349	0.230243	0.115825	0.0705094	0.576019	0.488719	0.464464	0.254739	0.106252
	C=8	0.513435	0.489173	0.171374	0.082373	0.072737	0.694351	0.444188	0.287623	0.130118	0.102492	0.576943	0.574782	0.399525	0.262237	0.159546
m_mi_cnv	C=2	7.61e-05	0.209116	0.041774	2.74e-05	0.00311346	0.118665	0.0274725	0.0439371	0.0165507	0.00854117	0.818128	0.607962	0.475877	0.041045	0.0265302
	C=3	0.137927	0.202077	0.0309124	0.000839593	0.0188322	0.435192	0.298759	0.214581	0.131628	0.0379496	0.402901	0.506953	0.303643	0.103429	0.0237301
	C=4	0.131211	0.171522	0.0716291	0.0115104	0.01938	0.447955	0.302561	0.185914	0.0962166	0.0331907	0.795087	0.627873	0.443171	0.136058	0.0524701
	C=5	0.151621	0.190373	0.0865328	0.023892	0.0203829	0.464289	0.29065	0.176008	0.104079	0.0494019	0.576159	0.569219	0.44303	0.194609	0.0583621
	C=6	0.164551	0.22423	0.126481	0.0324477	0.0384259	0.490287	0.374821	0.218819	0.103139	0.0350678	0.620922	0.509866	0.439243	0.124349	0.0971743
	C=7	0.185499	0.243971	0.134449	0.0375966	0.054424	0.592319	0.40666	0.233347	0.126911	0.0554767	0.56451	0.617429	0.415975	0.191359	0.108999
	C=8	0.36979	0.265443	0.14092	0.0447736	0.0607356	0.504253	0.399529	0.251607	0.115235	0.0639422	0.623655	0.514419	0.417962	0.257159	0.128641
m_me_cnv	C=2	0.230927	0.0292333	0.0150298	0.00777285	0.0182582	0.581791	0.481906	0.431272	0.328526	0.269649	0.415518	0.647873	0.227304	0.116151	0.0891267
	C=3	0.387159	0.32881	0.272203	0.280902	0.0282418	0.186278	0.43641	0.415035	0.309527	0.281661	0.846171	0.38284	0.374885	0.208543	0.0578966
	C=4	0.445586	0.362747	0.384338	0.281854	0.138846	0.509979	0.51322	0.423638	0.369311	0.315038	0.932045	0.885622	0.426596	0.295271	0.103632
	C=5	0.39294	0.314153	0.341413	0.26242	0.143806	0.439492	0.389599	0.31968	0.268753	0.240305	0.675033	0.710232	0.711925	0.367518	0.151168
	C=6	0.430729	0.394418	0.359222	0.288792	0.231021	0.44329	0.393647	0.382636	0.280847	0.236021	0.678026	0.616857	0.663175	0.46291	0.157225
	C=7	0.42521	0.416817	0.347833	0.32288	0.227593	0.522487	0.494458	0.48351	0.32944	0.262681	0.711643	0.650817	0.642853	0.495052	0.123545
	C=8	0.461172	0.459816	0.367754	0.330813	0.271079	0.677843	0.49963	0.448666	0.304047	0.239678	0.720895	0.632007	0.606436	0.439008	0.192627
mi_me_cnv	C=2	0.233929	0.000217705	0.0159164	0.000784579	0.00840038	0.0901141	0.0497579	0.0516389	0.00309679	0.0190891	0.875055	0.664524	0.331678	0.185002	0.0880328
	C=3	0.198212	0.0189342	0.0128204	0.0174001	0.0164804	0.481813	0.271198	0.256424	0.14426	0.0394518	0.498761	0.432975	0.383759	0.233289	0.0558624
	C=4	0.296357	0.0291105	0.0284274	0.024464	0.0153713	0.3708	0.289705	0.193883	0.0879996	0.0330765	0.433037	0.36552	0.274317	0.157058	0.0665545
	C=5	0.390586	0.0506332	0.0396778	0.0358837	0.0253716	0.467403	0.355776	0.265411	0.10148	0.0549687	0.567744	0.363058	0.271121	0.131927	0.0885971
	C=6	0.345621	0.0633584	0.0554504	0.0473891	0.0417625	0.465739	0.391233	0.243706	0.0911215	0.0524839	0.566701	0.571131	0.243389	0.127532	0.0846726
	C=7	0.42091	0.0965754	0.0743727	0.0503851	0.0469734	0.537261	0.384288	0.254702	0.0752328	0.0703372	0.559591	0.434629	0.267906	0.143656	0.087455
	C=8	0.501738	0.124265	0.098872	0.0512586	0.0593433	0.451616	0.414912	0.253728	0.0947016	0.0693986	0.511106	0.466759	0.251597	0.131846	0.1057
m_mi_me_cnv	C=2	1	0.00364038	5.46e-05	0.00136485	0.0575059	0.0857049	0.01205	0.0138966	0.00281073	0.000175222	0.769818	0.307415	0.0571953	0.0116874	0.027559
	C=3	0.75761	0.0114491	0.00612483	0.00525714	0.0201825	0.461436	0.416632	0.248359	0.119469	0.0465036	0.859776	0.297116	0.236398	0.10675	0.0404308
	C=4	0.660706	0.0478318	0.0154762	0.0195844	0.034826	0.388297	0.37666	0.167236	0.0775114	0.0528131	0.831115	0.682177	0.41464	0.205768	0.0543307
	C=5	0.725858	0.0546408	0.0417677	0.0322063	0.048131	0.408984	0.38743	0.295014	0.109508	0.0523091	0.548373	0.555902	0.418141	0.181387	0.105262
	C=6	0.655458	0.0566322	0.0507934	0.0432545	0.0456056	0.458859	0.391159	0.284921	0.0836089	0.0522452	0.693503	0.582335	0.441632	0.264161	0.101965
	C=7	0.572601	0.160624	0.0624205	0.0372958	0.0659651	0.507231	0.415412	0.294611	0.0496921	0.0599377	0.651443	0.552378	0.462942	0.249869	0.118532
	C=8	0.65698	0.176988	0.0740105	0.0432687	0.0892655	0.459619	0.407444	0.277144	0.0868717	0.0605154	0.590005	0.637145	0.459099	0.286313	0.135996
Methods		Subtype-GAN
Data Comb.	Noise Level	0.5	1	2	3	4
m_mi	C=2	0.349093	0.420174	0.321624	0.303842	0.0919192
	C=3	0.626238	0.471447	0.438444	0.312985	0.106249
	C=4	0.490745	0.411632	0.411321	0.309845	0.116038
	C=5	0.472313	0.433597	0.35538	0.357579	0.121748
	C=6	0.439895	0.453054	0.332263	0.30819	0.134751
	C=7	0.453365	0.408373	0.306042	0.304579	0.126803
	C=8	0.401353	0.37437	0.331952	0.305908	0.120348
m_me	C=2	0.362976	0.36088	0.257439	0.15435	0.205995
	C=3	0.396474	0.442431	0.369714	0.205468	0.164864
	C=4	0.385245	0.39686	0.367981	0.209323	0.204211
	C=5	0.514158	0.48156	0.354527	0.216607	0.187467
	C=6	0.478935	0.521041	0.396698	0.219478	0.198638
	C=7	0.48282	0.493526	0.408747	0.205948	0.206899
	C=8	0.446292	0.45771	0.336773	0.236219	0.185092
m_cnv	C=2	0.342332	0.331729	0.219276	0.202057	0.120754
	C=3	0.451652	0.396819	0.250464	0.33303	0.182938
	C=4	0.45578	0.415354	0.241156	0.290102	0.169161
	C=5	0.519092	0.52183	0.313748	0.313144	0.145104
	C=6	0.493382	0.495706	0.313868	0.301378	0.150649
	C=7	0.502472	0.521745	0.326965	0.290557	0.140888
	C=8	0.446112	0.447802	0.250143	0.270911	0.148003
mi_me	C=2	0.209764	0.184734	0.0729005	0.0190453	0.041022
	C=3	0.202776	0.288802	0.223202	0.0876675	0.0373316
	C=4	0.339776	0.336259	0.226637	0.0977182	0.0280403
	C=5	0.315672	0.362756	0.22629	0.0747728	0.0431982
	C=6	0.365394	0.331778	0.223907	0.105714	0.042404
	C=7	0.403689	0.34873	0.227908	0.0958829	0.0360626
	C=8	0.411554	0.375442	0.25933	0.10209	0.0435461
mi_cnv	C=2	0.208192	0.215057	0.0789035	0.0199772	0.00703636
	C=3	0.247056	0.341783	0.121384	0.0222611	0.0152889
	C=4	0.3796	0.351156	0.158135	0.0732261	0.0253234
	C=5	0.371356	0.383874	0.136953	0.0677525	0.0230947
	C=6	0.389349	0.417206	0.166567	0.077671	0.0176201
	C=7	0.359373	0.410985	0.15348	0.0800933	0.026476
	C=8	0.417143	0.355409	0.163779	0.0916259	0.0416633
me_cnv	C=2	0.315431	0.288978	0.336696	0.237483	0.15721
	C=3	0.300594	0.382914	0.365975	0.169875	0.183189
	C=4	0.432356	0.452682	0.379643	0.222729	0.214268
	C=5	0.456648	0.388618	0.367222	0.22019	0.186193
	C=6	0.45284	0.533723	0.376709	0.203075	0.190852
	C=7	0.430645	0.424805	0.342599	0.207296	0.195159
	C=8	0.424133	0.492776	0.372326	0.1967	0.178395
m_mi_me	C=2	0.213746	0.22052	0.170901	0.161284	0.158292
	C=3	0.381708	0.478896	0.327558	0.293037	0.1308
	C=4	0.438148	0.409597	0.387578	0.303857	0.138353
	C=5	0.394352	0.387512	0.337426	0.29467	0.133469
	C=6	0.480394	0.478836	0.411586	0.287622	0.115515
	C=7	0.461037	0.449112	0.322035	0.247422	0.149497
	C=8	0.452417	0.45887	0.353479	0.260663	0.138117
m_mi_cnv	C=2	0.31393	0.318504	0.282343	0.263068	0.00808554
	C=3	0.494627	0.285965	0.349988	0.267194	0.0480674
	C=4	0.510611	0.298468	0.379044	0.294505	0.0809944
	C=5	0.489192	0.315507	0.352555	0.22734	0.0794607
	C=6	0.456151	0.287356	0.326731	0.239991	0.0797103
	C=7	0.45126	0.408469	0.348355	0.239125	0.0679899
	C=8	0.352109	0.29567	0.275769	0.224683	0.0682649
m_me_cnv	C=2	0.313386	0.344181	0.301737	0.253137	0.094481
	C=3	0.425235	0.291259	0.315395	0.295038	0.116883
	C=4	0.390153	0.318309	0.37483	0.256596	0.123807
	C=5	0.412027	0.375746	0.339823	0.247136	0.124696
	C=6	0.425797	0.337492	0.308876	0.234901	0.114948
	C=7	0.402568	0.407431	0.260939	0.228208	0.107886
	C=8	0.398185	0.320369	0.299365	0.25433	0.107693
mi_me_cnv	C=2	0.15342	0.186484	0.0988573	0.0457203	0.00623228
	C=3	0.239388	0.341585	0.175838	0.0673514	0.00983247
	C=4	0.333734	0.313288	0.172157	0.0587601	0.0140133
	C=5	0.368496	0.303586	0.159715	0.0772912	0.0166387
	C=6	0.356847	0.273431	0.181677	0.0740073	0.0170385
	C=7	0.345869	0.290612	0.181332	0.0667473	0.0233962
	C=8	0.359836	0.306845	0.239345	0.0747044	0.0188579
m_mi_me_cnv	C=2	0.316947	0.281349	0.289916	0.171677	0.022232
	C=3	0.24485	0.305246	0.250521	0.147959	0.0238296
	C=4	0.283662	0.264596	0.338923	0.188674	0.04303
	C=5	0.433792	0.355968	0.323793	0.164226	0.0432028
	C=6	0.358336	0.400028	0.328363	0.189005	0.0526074
	C=7	0.401111	0.416388	0.303826	0.180181	0.059669
	C=8	0.404371	0.340662	0.2974	0.170245	0.0549543

## Sheet: ARI
Dataset #2 BRCA Noise Datasets ARI
Methods		iClusterBayes					LRAcluster					SNF
Data Comb.	Noise Level	0.5	1	2	3	4	0.5	1	2	3	4	0.5	1	2	3	4
m_mi	C=2	0.984188	0.942628	0.87704	0.818452	0.799817	0.973732	0.937551	0.927271	0.828113	0.799825	0.921744	0.779989	0.706465	0.67997	0.525453
	C=3	0.946519	0.907754	0.817484	0.707568	0.694226	0.950057	0.919887	0.893681	0.757367	0.73907	0.875232	0.865279	0.747534	0.650954	0.48021
	C=4	0.717337	0.230962	0.20607	0.27573	0.416602	0.983267	0.947858	0.750252	0.760633	0.637739	0.916682	0.835906	0.699528	0.516088	0.414694
	C=5	0.626885	0.123545	0.103645	0.168653	0.266288	0.937333	0.943037	0.8491	0.67858	0.60575	0.913195	0.781902	0.659955	0.467778	0.318205
	C=6	0.288826	0.0562089	0.0575234	0.121186	0.119677	0.928813	0.917537	0.768068	0.651469	0.610179	0.869914	0.743007	0.612374	0.402301	0.324658
	C=7	0.0511254	0.0238814	0.0120677	0.0608221	0.0542397	0.622329	0.629424	0.787604	0.617032	0.46844	0.846768	0.688927	0.637325	0.290673	0.212836
	C=8	0.0475454	0.0375492	0.0154294	0.0872074	0.0656106	0.955204	0.869161	0.803684	0.627627	0.451107	0.587562	0.469052	0.510116	0.298364	0.215516
m_me	C=2	0.979002	0.947923	0.882304	0.862588	0.80476	0.953057	0.932555	0.89224	0.819036	0.785868	0.950353	0.821392	0.594392	0.462218	0.450941
	C=3	0.940758	0.84409	0.772102	0.701509	0.241331	0.977665	0.926152	0.884771	0.874842	0.741196	0.97084	0.922618	0.839034	0.780197	0.644454
	C=4	0.527884	0.795932	0.830161	0.785089	0.692757	0.959384	0.923455	0.832508	0.826294	0.77852	0.439625	0.448649	0.37328	0.375147	0.347407
	C=5	0.368805	0.415069	0.31485	0.247152	0.412374	0.966092	0.868718	0.799573	0.823736	0.41196	0.885357	0.744758	0.654151	0.517195	0.458417
	C=6	0.298214	0.0843756	0.0963256	0.11776	0.27489	0.952043	0.861893	0.555657	0.665816	0.523498	0.796619	0.749311	0.515184	0.520592	0.432357
	C=7	0.0689055	0.0372377	0.0473406	0.118702	0.0562627	0.924236	0.947302	0.494763	0.47844	0.395485	0.622338	0.644604	0.493105	0.462929	0.408568
	C=8	0.0193376	0.0162414	0.0342322	0.0497639	0.0436188	0.962938	0.939324	0.511965	0.718954	0.58249	0.87386	0.738258	0.602634	0.555506	0.432453
m_cnv	C=2	0.941003	0.904631	0.904243	0.858286	0.756538	0.973106	0.941263	0.863806	0.884374	0.776678	0.914366	0.888504	0.81691	0.788565	0.711277
	C=3	0.943223	0.912083	0.847841	0.800656	0.644434	0.963156	0.929565	0.854787	0.815783	0.710795	0.928163	0.843085	0.674779	0.596498	0.548683
	C=4	0.846413	0.765344	0.630305	0.63677	0.663445	0.966185	0.949095	0.857572	0.757109	0.708868	0.912734	0.738197	0.471008	0.370726	0.323578
	C=5	0.487972	0.375505	0.427428	0.461337	0.554679	0.835968	0.933429	0.847338	0.659406	0.607516	0.853291	0.757836	0.599152	0.41232	0.33549
	C=6	0.169027	0.111143	0.155388	0.31831	0.316889	0.96644	0.568277	0.570347	0.570903	0.423833	0.729988	0.554523	0.435396	0.410981	0.299387
	C=7	0.088632	0.0748439	0.0957401	0.110721	0.12532	0.971001	0.940621	0.789037	0.607793	0.530256	0.818663	0.667981	0.640488	0.386634	0.369203
	C=8	0.0316484	0.0575421	0.0497826	0.0869	0.116836	0.951736	0.911681	0.767136	0.434376	0.53286	0.601535	0.490913	0.398968	0.345616	0.29437
mi_me	C=2	0.00356813	0.557437	0.0471453	0.0224735	0.0185697	0.942794	0.828618	0.739847	0.82382	0.767337	0.939407	0.860809	0.715432	0.352346	0.27732
	C=3	0.938469	0.914816	0.746281	0.836635	0.731153	0.9333	0.935677	0.899325	0.817698	0.75082	0.911021	0.853022	0.720061	0.518483	0.253322
	C=4	0.703236	0.312878	0.132988	0.236929	0.368589	0.945949	0.935631	0.859604	0.767274	0.607509	0.778957	0.638766	0.562538	0.481377	0.37987
	C=5	0.310987	0.199417	0.169599	0.223833	0.241144	0.940974	0.841988	0.841147	0.553451	0.559576	0.905267	0.764331	0.629615	0.364903	0.369573
	C=6	0.155958	0.0276162	0.0449155	0.15326	0.192041	0.892373	0.82164	0.83437	0.660179	0.624069	0.607695	0.420642	0.396955	0.325065	0.212589
	C=7	0.018376	0.0261338	0.0128778	0.0404915	0.0429381	0.94414	0.880147	0.843387	0.558184	0.533371	0.626531	0.455518	0.328537	0.300247	0.160783
	C=8	0.0137466	0.00625913	0.00969379	0.00897307	0.0133598	0.944999	0.526007	0.590507	0.527322	0.38777	0.803566	0.688254	0.498581	0.310631	0.216623
mi_cnv	C=2	0.906571	0.747939	0.0445225	0.0533756	0.0533712	0.972674	0.967202	0.918861	0.846084	0.768234	0.891447	0.79869	0.74304	0.606895	0.497651
	C=3	0.891728	0.72462	0.759113	0.680896	0.538787	0.959704	0.960565	0.888001	0.768546	0.700891	0.836733	0.730249	0.457218	0.378724	0.258426
	C=4	0.840153	0.732868	0.5224	0.632943	0.470488	0.962364	0.959551	0.887847	0.790281	0.696403	0.821535	0.645031	0.341032	0.244806	0.18828
	C=5	0.426887	0.405417	0.372639	0.447513	0.443361	0.963501	0.918036	0.793145	0.721388	0.41427	0.47819	0.524838	0.32495	0.240781	0.140539
	C=6	0.295582	0.179346	0.279807	0.176669	0.240616	0.938944	0.87644	0.781664	0.616022	0.462499	0.749631	0.621681	0.377549	0.244499	0.123366
	C=7	0.143707	0.143679	0.114343	0.12546	0.0998065	0.764061	0.856981	0.724328	0.508756	0.477512	0.769646	0.514283	0.384374	0.261831	0.147269
	C=8	0.218681	0.09496	0.114889	0.107997	0.091854	0.962884	0.688105	0.605204	0.483665	0.460139	0.728902	0.581453	0.447725	0.217239	0.138491
me_cnv	C=2	0.963398	0.927481	0.877347	0.833419	0.767325	0.968587	0.937675	0.897235	0.843089	0.762715	0.917301	0.748944	0.643344	0.62652	0.481341
	C=3	0.751604	0.797943	0.81735	0.68505	0.638378	0.834836	0.859258	0.789763	0.821324	0.690327	0.891401	0.793846	0.653673	0.55734	0.256581
	C=4	0.71371	0.548996	0.54347	0.658936	0.543676	0.791213	0.794351	0.772023	0.758878	0.643061	0.562993	0.424266	0.371548	0.356161	0.330582
	C=5	0.579147	0.25489	0.320643	0.276235	0.341502	0.440442	0.417581	0.436604	0.38396	0.379279	0.863007	0.751498	0.418509	0.379475	0.370578
	C=6	0.189095	0.198728	0.108276	0.304443	0.229643	0.41927	0.421119	0.379098	0.71689	0.403862	0.569181	0.476952	0.42117	0.332206	0.286298
	C=7	0.0849916	0.0965898	0.100124	0.168659	0.0994806	0.47498	0.496041	0.434237	0.462892	0.403593	0.767469	0.681194	0.479604	0.381669	0.367465
	C=8	0.0224807	0.0453859	0.0460558	0.14728	0.14879	0.58842	0.551745	0.565932	0.737624	0.412958	0.787028	0.679068	0.540475	0.43036	0.354463
m_mi_me	C=2	0.968582	0.927468	0.892229	0.852799	0.785888	0.907188	0.927453	0.922379	0.804749	0.818925	0.949736	0.922392	0.818174	0.746247	0.686514
	C=3	0.856882	0.693293	0.571413	0.722671	0.610152	0.978692	0.951328	0.900046	0.880367	0.774207	0.921003	0.894339	0.821715	0.80424	0.669025
	C=4	0.80766	0.774292	0.781545	0.653874	0.709554	0.975075	0.885158	0.914361	0.845938	0.780639	0.894891	0.509625	0.509762	0.414428	0.367293
	C=5	0.436384	0.292045	0.183623	0.208988	0.299866	0.976477	0.85484	0.889247	0.775863	0.505992	0.918603	0.799105	0.579972	0.487646	0.388593
	C=6	0.0988044	0.240564	0.0946285	0.236401	0.332558	0.894506	0.713931	0.463575	0.694759	0.571227	0.499247	0.452899	0.397376	0.367467	0.30673
	C=7	0.0547614	0.0410576	0.0206995	0.0789712	0.174467	0.963685	0.462875	0.81934	0.739592	0.508833	0.828429	0.62079	0.46046	0.378226	0.284921
	C=8	0.00782423	0.0104187	0.01371	0.0200116	0.0203054	0.948106	0.865565	0.761982	0.71165	0.519439	0.902407	0.809094	0.571603	0.440504	0.307022
m_mi_cnv	C=2	0.973048	0.925624	0.883957	0.878802	0.772162	0.967825	0.936245	0.884374	0.853412	0.776671	0.899856	0.844602	0.730189	0.772071	0.577159
	C=3	0.929824	0.885535	0.801569	0.772705	0.697194	0.942641	0.926146	0.864758	0.802785	0.73813	0.909549	0.867756	0.703163	0.693799	0.485956
	C=4	0.640238	0.85644	0.64735	0.602459	0.574038	0.986373	0.947359	0.84206	0.790582	0.695029	0.874507	0.770296	0.387704	0.312548	0.258905
	C=5	0.379768	0.317062	0.243436	0.474095	0.341918	0.953177	0.94578	0.80607	0.641735	0.652379	0.808843	0.687323	0.484658	0.344742	0.27784
	C=6	0.249093	0.218058	0.195216	0.226133	0.24079	0.912317	0.9241	0.481023	0.699193	0.424894	0.840041	0.683188	0.486442	0.348103	0.286272
	C=7	0.0652194	0.0339719	0.0472449	0.0533669	0.0556061	0.935469	0.898241	0.794511	0.623947	0.450369	0.554995	0.633559	0.392774	0.323234	0.25719
	C=8	0.0464595	0.0490623	0.0562906	0.114075	0.111717	0.917021	0.75608	0.821338	0.438782	0.522128	0.704058	0.457931	0.397336	0.376995	0.296648
m_me_cnv	C=2	0.984212	0.968555	0.917266	0.872257	0.818774	0.984206	0.973749	0.907152	0.877165	0.842786	0.949347	0.808642	0.736481	0.568776	0.539489
	C=3	0.95655	0.92803	0.875385	0.850247	0.78786	0.965053	0.947422	0.899414	0.860627	0.79543	0.946155	0.872337	0.745173	0.655517	0.626813
	C=4	0.630298	0.80401	0.514275	0.758014	0.638634	0.989048	0.890654	0.878433	0.529441	0.453561	0.884776	0.721644	0.483289	0.380977	0.311885
	C=5	0.336081	0.262654	0.32	0.367664	0.303881	0.948174	0.621743	0.71617	0.617098	0.623735	0.809955	0.538483	0.449338	0.367111	0.325836
	C=6	0.154212	0.0811715	0.16629	0.192958	0.211493	0.860723	0.856839	0.799782	0.812804	0.518038	0.53881	0.360633	0.467742	0.394593	0.297984
	C=7	0.124476	0.0678695	0.107697	0.287116	0.192095	0.97444	0.823069	0.80991	0.815913	0.50176	0.671238	0.409512	0.376895	0.37477	0.309204
	C=8	0.0623743	0.0186315	0.043698	0.0752704	0.0661745	0.964912	0.916404	0.670811	0.640031	0.425796	0.885365	0.567246	0.384106	0.371879	0.343009
mi_me_cnv	C=2	0.963399	0.93257	0.867492	0.833423	0.776606	0.984231	0.942793	0.912297	0.847944	0.771964	0.955292	0.890651	0.807704	0.29804	0.295964
	C=3	0.905178	0.729468	0.735143	0.698062	0.698273	0.824422	0.843119	0.80161	0.808787	0.718116	0.933711	0.815166	0.643931	0.522414	0.511203
	C=4	0.774184	0.679941	0.689651	0.69962	0.662199	0.615878	0.608961	0.606372	0.68447	0.491703	0.863208	0.414457	0.350786	0.320658	0.28223
	C=5	0.240205	0.485314	0.193334	0.450566	0.353658	0.398681	0.409063	0.407082	0.368795	0.358379	0.546033	0.449481	0.363333	0.307992	0.236908
	C=6	0.24286	0.132885	0.172849	0.153975	0.215795	0.388857	0.40754	0.375961	0.606701	0.384536	0.813646	0.652841	0.432822	0.383133	0.30161
	C=7	0.0892434	0.0303595	0.0680102	0.0557401	0.0742691	0.471526	0.506541	0.440165	0.447544	0.404369	0.617598	0.414242	0.324525	0.296979	0.238349
	C=8	0.0799384	0.0670551	0.0786503	0.0989257	0.156919	0.569656	0.797727	0.431555	0.489913	0.375346	0.753374	0.477846	0.403262	0.281649	0.2332
m_mi_me_cnv	C=2	0.963326	0.973745	0.902091	0.897012	0.8428	0.973719	0.958105	0.911986	0.857291	0.842717	0.96097	0.901316	0.895602	0.742401	0.794325
	C=3	0.797475	0.889395	0.79755	0.849538	0.821228	0.987406	0.959065	0.925639	0.844585	0.791348	0.912929	0.876391	0.762083	0.717966	0.580635
	C=4	0.807955	0.846385	0.48804	0.672556	0.704779	0.96699	0.452877	0.458711	0.654069	0.784698	0.868726	0.770292	0.452875	0.368596	0.320636
	C=5	0.305326	0.286058	0.175531	0.357511	0.251617	0.742512	0.881802	0.825351	0.733901	0.39407	0.894214	0.718886	0.603789	0.400667	0.339774
	C=6	0.319583	0.142875	0.207914	0.145551	0.28753	0.964102	0.864841	0.563772	0.780446	0.566457	0.715361	0.400601	0.425318	0.367816	0.278892
	C=7	0.114513	0.0672102	0.108894	0.127242	0.138155	0.969154	0.791817	0.867954	0.795649	0.571879	0.814113	0.67068	0.538785	0.332371	0.274302
	C=8	0.110341	0.0399799	0.0520662	0.104709	0.0623725	0.94509	0.899521	0.534697	0.786579	0.410504	0.532216	0.577817	0.407297	0.360372	0.299493
Methods		PFA					PINS					NEMO
Data Comb.	Noise Level	0.5	1	2	3	4	0.5	1	2	3	4	0.5	1	2	3	4
m_mi	C=2	0.141347	0.0124414	0.00982952	0.0012024	0.00171699	0.36593	0.340985	0.248697	0.163481	0.0908325	0.942595	0.872117	0.813623	0.725478	0.576741
	C=3	0.0165094	0.00949712	0.00272491	0.00760918	-0.00245295						0.928205	0.870208	0.766013	0.635095	0.548492
	C=4	0.0584054	0.0190115	0.0026444	-3.41647e-05	0.00663033						0.93934	0.825461	0.731407	0.543115	0.459701
	C=5	0.0176697	0.00508498	-0.00139421	-0.000679479	0.0031115						0.873212	0.746452	0.681825	0.452408	0.337759
	C=6	0.0271379	0.0169057	0.00812699	0.00325817	-0.000129506						0.885595	0.775158	0.644994	0.459831	0.351271
	C=7	0.0506118	0.00925293	0.00168841	0.00643772	-0.000520666						0.884246	0.727021	0.587152	0.369945	0.268551
	C=8	0.0705154	0.0175367	0.0143517	0.00613368	-0.00123039						0.75972	0.650729	0.441708	0.307566	0.207943
m_me	C=2	-0.00242226	-0.00192611	0.00318687	-0.0049114	-0.000531883	0.247533	0.735501	0.217396	0.0606755	0.0603487	0.900701	0.841076	0.746692	0.649789	0.620298
	C=3	0.0143547	-0.00354286	-0.00201819	-0.000491055	-0.00131632						0.942856	0.914138	0.825009	0.770172	0.678364
	C=4	0.0293258	-0.00133525	0.00224972	0.00224678	0.00214094						0.94464	0.769218	0.617494	0.575632	0.481405
	C=5	0.178042	-0.000291103	-0.00293283	0.00124754	-0.00288003						0.864539	0.754024	0.618043	0.524672	0.491759
	C=6	0.0543872	0.00772498	0.005987	0.000646875	-0.000848316						0.793096	0.614561	0.581139	0.481589	0.420285
	C=7	0.0898585	0.0090517	0.000102229	-0.00157499	0.00148243						0.783972	0.653844	0.409814	0.459992	0.366427
	C=8	0.13142	0.0145779	0.00138775	-0.000394821	0.00164087						0.718409	0.697399	0.61592	0.520975	0.35821
m_cnv	C=2	0.125705	0.00271284	-0.00191873	-0.000997316	-0.000722896	0.447869	0.872039	0.778302	0.607001	0.460524	0.978121	0.90857	0.903175	0.83195	0.697824
	C=3	0.249381	0.00460229	0.0111589	-0.0008162	-0.00194766						0.921214	0.870905	0.709195	0.638994	0.568602
	C=4	0.176658	0.00470143	0.0125739	0.00168952	-0.00174114						0.460461	0.401895	0.40284	0.356952	0.306287
	C=5	0.0787972	0.00446086	0.00649127	0.00275613	0.00107356						0.88986	0.861476	0.678688	0.454217	0.294964
	C=6	0.10393	-0.000252714	0.00317577	-0.000426594	-0.00127189						0.875465	0.84153	0.568258	0.418608	0.326562
	C=7	0.0818744	0.000629802	0.00857401	0.00718381	0.00316599						0.655183	0.617139	0.480587	0.299309	0.350913
	C=8	0.183818	0.00731825	0.0031187	0.00328752	0.00248112						0.759876	0.695224	0.500582	0.356865	0.336672
mi_me	C=2	0.208031	0.000645593	0.000235074	-0.00151759	0.000701583	0.658424	0.549774	0.0900759	0.177508	0.0226376	0.890273	0.860149	0.646038	0.385775	0.329617
	C=3	0.0310239	0.000514489	-0.000215535	0.00434657	0.00334126						0.909468	0.860879	0.26739	0.233651	0.245724
	C=4	0.193838	0.0134492	-0.00259824	0.000236978	-0.000549271						0.886524	0.787675	0.649976	0.63241	0.519361
	C=5	0.155826	0.0105895	0.01321	0.00487633	0.000827606						0.898328	0.793878	0.629894	0.386925	0.346485
	C=6	0.227304	0.0112088	0.0196956	0.00755089	0.00384631						0.552184	0.776209	0.450624	0.37623	0.319517
	C=7	0.0571045	0.0355167	0.00643398	0.0026389	0.00189808						0.42387	0.45536	0.322291	0.296205	0.217569
	C=8	0.157305	0.0379612	0.0218482	0.00518893	-0.00192413						0.698143	0.4957	0.392563	0.361816	0.237854
mi_cnv	C=2	0.0895882	0.00352667	0.0015727	0.0061727	-0.00191489	0.903123	0.332598	0.605169	0.383014	0.3915	0.947487	0.84676	0.751058	0.6068	0.534128
	C=3	0.174761	0.0149333	-0.00114193	-0.00371157	0.00544328						0.869807	0.756002	0.501364	0.378089	0.276188
	C=4	0.122393	0.00646653	0.00211251	-0.00204931	-0.00129522						0.767192	0.682072	0.404485	0.229167	0.202771
	C=5	0.156483	0.00278424	0.0143551	0.000238226	0.000618441						0.766027	0.667877	0.309704	0.215942	0.215313
	C=6	0.0947746	0.00390358	0.0075937	0.00526779	-0.00337545						0.81762	0.453118	0.42889	0.27214	0.158532
	C=7	0.107107	0.0141276	0.00823141	0.0108453	0.00611696						0.598919	0.630706	0.383853	0.24137	0.144272
	C=8	0.102912	0.0161694	0.00653705	0.0059934	-0.0039745						0.661431	0.581834	0.334269	0.199049	0.120931
me_cnv	C=2	0.219846	-4.73496e-05	0.00705927	-0.00202971	0.0014696	0.983492	0.967062	0.940241	-0.00367394	-0.00263301	0.897215	0.823806	0.767322	0.686369	0.573361
	C=3	0.0921021	0.0098937	0.00905646	0.000720417	0.000332933						0.867562	0.743381	0.32731	0.313403	0.272565
	C=4	0.140291	0.00267141	0.00298596	1.72836e-05	-0.0016571						0.867322	0.811442	0.77533	0.612786	0.568505
	C=5	0.151629	0.0256463	0.00957029	-0.00199972	-0.000770554						0.880555	0.676136	0.446363	0.388039	0.382415
	C=6	0.16418	0.00132261	0.00668216	-0.00161375	0.00350883						0.886949	0.829175	0.652887	0.510442	0.448479
	C=7	0.121653	0.028117	0.000112855	-0.00190297	0.000409789						0.843878	0.792562	0.629035	0.433479	0.353465
	C=8	0.20718	0.00834544	0.000193724	0.00281674	0.000803848						0.804124	0.75634	0.677914	0.447566	0.360366
m_mi_me	C=2	0.0291772	0.0278595	0.0040206	-0.000195919	0.00312262	0.19762	0.288372	0.917041	0.147689	0.250222	0.95615	0.903189	0.822006	0.72617	0.661213
	C=3	0.138429	0.0316999	-0.00145285	-0.00152964	-0.00247677						0.967677	0.948459	0.865457	0.790885	0.702023
	C=4	0.17183	0.0152523	0.00182004	0.0175084	-0.00204093						0.699116	0.661545	0.534682	0.453194	0.403599
	C=5	0.20288	0.035356	0.00118434	0.00221651	0.00404731						0.940034	0.818336	0.554385	0.46291	0.369884
	C=6	0.0829039	0.0104933	0.00983232	-0.00155508	2.45365e-05						0.881379	0.733893	0.516512	0.474841	0.41198
	C=7	0.198464	0.0295876	0.0059127	0.00853256	0.00858496						0.868467	0.636855	0.608457	0.37116	0.348005
	C=8	0.081413	0.0443962	0.0139642	0.0127545	0.00582627						0.779393	0.757232	0.615303	0.453638	0.319023
m_mi_cnv	C=2	-0.00131926	-0.000368123	0.00120218	-0.00075531	0.000846035	0.422707	0.896667	0.851941	0.134036	0.127311	0.962799	0.916087	0.807042	0.81139	0.688196
	C=3	0.110788	0.00567207	0.0127349	0.000989941	0.00774596						0.910437	0.913044	0.77841	0.747889	0.590686
	C=4	0.042945	0.031411	0.000128496	0.0069178	0.00830059						0.818008	0.733383	0.675375	0.535963	0.360694
	C=5	0.213746	0.00700213	0.0104955	0.000830985	0.00734404						0.854737	0.753857	0.635458	0.451012	0.302507
	C=6	0.0674921	0.0145207	0.00535727	0.00381042	0.00794849						0.56463	0.766362	0.618639	0.390371	0.279981
	C=7	0.222716	0.00410668	-1.55868e-05	0.00154068	0.00105517						0.485735	0.410081	0.523803	0.274813	0.277232
	C=8	0.148144	0.028324	0.00279484	0.0112424	0.00164302						0.893425	0.755793	0.465506	0.320222	0.269334
m_me_cnv	C=2	0.0129427	0.00162597	-0.0160119	-0.0147433	-0.00276293	0.439039	0.153388	0.107625	0.246793	0.638651	0.915401	0.864899	0.849788	0.73603	0.713544
	C=3	0.0773231	0.000234648	-0.00895086	-0.00803972	-0.00496896						0.923519	0.849324	0.72729	0.683042	0.636558
	C=4	0.0899651	-0.000804376	-0.0154468	-0.00860909	-0.0041554						0.850457	0.73075	0.509054	0.449242	0.371929
	C=5	0.187885	-0.00277727	-0.0309001	-0.00855294	-0.00218332						0.817241	0.684528	0.432381	0.373854	0.322053
	C=6	0.218984	-0.0059292	-0.0261441	-0.0249806	-0.0114646						0.539951	0.734442	0.676152	0.516548	0.385259
	C=7	0.181276	-0.00980144	-0.0118747	-0.0254584	-0.010753						0.597234	0.583769	0.447913	0.358427	0.323022
	C=8	0.173609	-0.0188141	-0.0179357	-0.0339364	-0.0215264						0.709964	0.736999	0.475881	0.397996	0.323281
mi_me_cnv	C=2	0.00276011	-0.000282558	0.000285461	3.49478e-05	0.00090265	0.88727	0.800043	0.651825	0.0586763	0.0565959	0.940951	0.85426	0.716654	0.386766	0.422931
	C=3	0.197686	0.00650439	0.0027558	0.000200624	0.0211393						0.857129	0.785237	0.666553	0.523952	0.406604
	C=4	0.235879	0.0456056	0.0261834	-0.000263418	-0.000254402						0.336767	0.313971	0.333621	0.301932	0.283903
	C=5	0.144127	0.0193516	0.00625193	-0.00108675	-0.00277543						0.547829	0.70558	0.57474	0.467649	0.335555
	C=6	0.137754	0.0142016	0.00449138	0.00177349	0.000520484						0.838755	0.439085	0.421184	0.326996	0.303287
	C=7	0.112964	0.00894833	0.00762266	-0.000291977	0.00197959						0.416583	0.508132	0.351692	0.313768	0.237757
	C=8	0.176512	0.0399861	0.0208224	0.00849342	0.00224861						0.524705	0.444137	0.371887	0.329512	0.215963
m_mi_me_cnv	C=2	-0.0020623	-0.000903074	-0.000257559	-0.000640401	-8.87456e-05	0.491779	0.414983	0.414754	0.156589	0.10519	0.961469	0.92926	0.913236	0.749424	0.739931
	C=3	0.104134	0.00652033	0.0103783	-0.00385264	0.00220164						0.933968	0.879718	0.798584	0.76054	0.660119
	C=4	0.226042	0.001231	0.000739321	0.00128941	-0.000454334						0.735623	0.752965	0.461996	0.438366	0.329966
	C=5	0.207291	0.00733014	0.00687586	0.0010075	0.000850717						0.884072	0.413791	0.629042	0.379362	0.317073
	C=6	0.194241	0.0136879	0.00664822	0.00533142	0.00180658						0.726498	0.68799	0.444004	0.348503	0.321885
	C=7	0.307405	0.0151485	0.00717427	0.00706838	0.0116129						0.815791	0.651586	0.462805	0.470299	0.345871
	C=8	0.244251	0.0449632	0.00520832	0.00655735	0.00263184						0.759627	0.685036	0.520278	0.342722	0.33424
Methods		moCluster					CIMLR					multiNMF
Data Comb.	Noise Level	0.5	1	2	3	4	0.5	1	2	3	4	0.5	1	2	3	4
m_mi	C=2	0.119264	0.103186	0.0973591	0.107311	0.111003	0.699375	0.589223	0.345987	0.274619	0.109865	0.642828	0.51472	0.472336	0.0686849	0.0294701
	C=3	0.207168	0.309691	0.212472	0.033939	0.0477637	0.650347	0.522903	0.364939	0.143977	0.0625892	0.87999	0.695639	0.409166	0.191478	0.0305147
	C=4	0.240541	0.332107	0.243921	0.0302152	0.0477509	0.721549	0.349913	0.246443	0.100654	0.0228315	0.379156	0.61167	0.354658	0.149826	0.0352984
	C=5	0.52428	0.486356	0.42097	0.0269161	0.029913	0.580554	0.321735	0.190805	0.0938409	0.00352719	0.658401	0.635381	0.32035	0.14041	0.0566109
	C=6	0.552983	0.600765	0.429057	0.0166905	0.0215406	0.567089	0.323226	0.131206	0.0783016	0.0344915	0.693531	0.6257	0.267438	0.109576	0.0119929
	C=7	0.549405	0.591234	0.428114	0.0170849	0.0207271	0.533438	0.358312	0.105205	0.048119	0.0148644	0.620013	0.475063	0.246583	0.127344	0.046571
	C=8	0.53934	0.562795	0.39045	0.0132543	0.022099	0.532655	0.247857	0.104404	0.064865	0.00716136	0.465106	0.443136	0.273013	0.0975862	0.036153
m_me	C=2	0.282779	0.235226	0.545596	0.431061	0.0186152	0.845852	0.906854	0.745292	0.778073	0.590491	0.80951	0.730787	0.0157026	0.00843608	0.00992223
	C=3	0.290167	0.245338	0.497461	0.338701	0.125297	0.886437	0.797	0.6236	0.608201	0.497924	0.945425	0.525955	0.311915	0.0622083	0.0859866
	C=4	0.284443	0.210397	0.455624	0.231044	0.0997588	0.835481	0.760528	0.58517	0.495771	0.434738	0.91444	0.677124	0.629313	0.293593	0.0234846
	C=5	0.43586	0.19393	0.384239	0.172538	0.0920879	0.669727	0.59068	0.513862	0.456822	0.347704	0.897599	0.809674	0.70738	0.448888	0.165013
	C=6	0.48583	0.215834	0.319251	0.19216	0.103434	0.596152	0.411423	0.38754	0.31865	0.258627	0.764246	0.743597	0.533826	0.400981	0.143935
	C=7	0.412174	0.207667	0.357998	0.187884	0.128832	0.667005	0.560828	0.374921	0.255916	0.263849	0.80352	0.631322	0.575002	0.366979	0.152245
	C=8	0.397057	0.210953	0.353024	0.170553	0.130826	0.583762	0.405408	0.389308	0.246975	0.210944	0.608486	0.474238	0.438213	0.32487	0.203652
m_cnv	C=2	0.816754	0.893023	0.682015	0.387236	-0.0646694	0.765483	0.722484	0.613745	0.577374	0.529472	0.932395	0.613947	0.544731	0.305252	0.225073
	C=3	0.328656	0.422164	0.381685	0.135934	0.00590089	0.710479	0.49219	0.387697	0.319371	0.272447	0.834999	0.316528	0.541341	0.256767	0.0360502
	C=4	0.306782	0.394636	0.369844	0.137047	0.00960533	0.741959	0.4767	0.412606	0.269522	0.241321	0.947639	0.588956	0.400099	0.176859	0.0352943
	C=5	0.32065	0.381091	0.395499	0.167988	-0.00447449	0.34692	0.383236	0.336988	0.264419	0.184562	0.387088	0.43323	0.490723	0.293517	0.0498412
	C=6	0.373498	0.370673	0.334974	0.33517	0.100257	0.380814	0.3163	0.277491	0.265822	0.170228	0.660283	0.606904	0.513693	0.366658	0.0856181
	C=7	0.373698	0.370854	0.337968	0.333129	0.0994775	0.421192	0.267194	0.308166	0.202581	0.156916	0.550358	0.508315	0.469177	0.325148	0.124533
	C=8	0.37494	0.329531	0.322886	0.333474	0.100632	0.382211	0.437007	0.282005	0.194223	0.116647	0.703027	0.529646	0.448813	0.277203	0.150022
mi_me	C=2	0.513115	0.00195773	0.00949622	-0.00648457	-0.0130484	0.781167	0.699137	0.364896	0.315115	0.177809	0.88727	0.744394	0.565397	0.147902	-0.00130434
	C=3	0.376501	0.0147657	0.0103546	0.00153215	0.0137206	0.643296	0.545885	0.328768	0.105865	0.054644	0.594287	0.477331	0.391404	0.0818178	0.0503119
	C=4	0.361159	0.0161026	0.00600024	0.011596	0.016888	0.684367	0.325179	0.219762	0.0941722	0.0474597	0.762085	0.64801	0.303799	0.173536	0.0497383
	C=5	0.315097	0.0469304	0.0393251	0.0237423	0.0280614	0.395517	0.240841	0.193506	0.0517771	0.0255904	0.68983	0.452111	0.27219	0.0885633	0.019395
	C=6	0.366181	0.117983	0.0649029	0.0482544	0.0383773	0.49442	0.2554	0.11597	0.0559029	0.0159357	0.499306	0.441942	0.197927	0.0538179	0.0236343
	C=7	0.368474	0.0811844	0.0472703	0.0478231	0.0392801	0.494689	0.298704	0.104973	0.0542204	0.0142867	0.514301	0.499202	0.234956	0.0913674	0.0240681
	C=8	0.349806	0.0870988	0.0474557	0.0323508	0.0361123	0.435214	0.23921	0.0869385	0.0318334	0.0167024	0.380037	0.408588	0.177859	0.0796619	0.0333708
mi_cnv	C=2	0.169375	0.0230277	0.494133	-0.0200823	0.125701	0.771753	0.518764	0.441951	0.32386	0.186703	0.882306	0.739847	0.553544	0.117087	0.0556247
	C=3	0.190471	0.0586007	0.321371	0.0127732	0.0480914	0.492196	0.370665	0.258191	0.164474	0.0738904	0.78999	0.693455	0.365109	0.0719907	0.0309385
	C=4	0.172024	0.0438813	0.342647	-0.000171117	0.0565284	0.433274	0.287656	0.192508	0.107814	0.05878	0.763996	0.466093	0.285938	0.137514	0.0235138
	C=5	0.181138	0.0599952	0.521344	0.029181	0.0613332	0.59644	0.33073	0.186294	0.0919664	0.0270948	0.684092	0.362014	0.223527	0.10421	0.0279048
	C=6	0.207723	0.116989	0.397863	0.012066	0.0323788	0.524005	0.233699	0.121461	0.0711075	0.0148859	0.41205	0.345136	0.215835	0.0789439	0.0288433
	C=7	0.218248	0.125742	0.422733	0.0115735	0.0418678	0.312273	0.248124	0.113784	0.0621598	0.0119717	0.444819	0.480519	0.180499	0.0734391	0.0272612
	C=8	0.197369	0.110429	0.354955	0.0203098	0.0317699	0.278099	0.218103	0.103934	0.0564816	0.0105433	0.379594	0.34353	0.224362	0.0780908	0.0307418
me_cnv	C=2	0.032519	0.113814	0.0317702	0.0716399	-0.0146936	0.28733	-0.0110135	0.00308385	0.0155321	0.00623138	0.947925	0.89724	0.00519572	0.000851108	0.00697348
	C=3	0.769137	0.0647835	0.0337691	0.0767793	0.0102331	0.454977	0.438161	0.344426	0.239855	0.142913	0.93097	0.895258	0.707371	0.217688	0.0036234
	C=4	0.728092	0.0926676	0.0798431	0.0653768	0.0876883	0.437586	0.56763	0.383277	0.235559	0.140786	0.954183	0.880523	0.789682	0.471252	0.171341
	C=5	0.669128	0.0885817	0.0691115	0.106843	0.104034	0.310373	0.310773	0.355662	0.251143	0.176815	0.828689	0.766394	0.739413	0.430333	0.145991
	C=6	0.727562	0.0871461	0.0808131	0.106995	0.159233	0.54278	0.366402	0.328916	0.275198	0.198181	0.409934	0.434182	0.398672	0.365949	0.234186
	C=7	0.47422	0.102832	0.0707414	0.0431287	0.1119	0.447419	0.398683	0.292386	0.184341	0.162315	0.57961	0.419645	0.374001	0.31179	0.159523
	C=8	0.474652	0.106452	0.0759854	0.05057	0.12081	0.349019	0.436359	0.26454	0.166974	0.119655	0.597607	0.561332	0.376044	0.296558	0.193313
m_mi_me	C=2	0.53008	0.347707	0.0228567	0.0115241	-0.0215648	0.814069	0.694683	0.37449	0.354676	0.184448	0.736022	0.658601	0.354328	0.0791447	0.0119038
	C=3	0.244006	0.377908	0.0369048	0.00325007	-0.00403266	0.763689	0.64622	0.396973	0.173741	0.123635	0.853224	0.653291	0.495643	0.13703	0.00091734
	C=4	0.31839	0.219862	0.00845189	0.00631431	0.00159712	0.610994	0.302399	0.224211	0.137811	0.0899187	0.77775	0.76272	0.328411	0.114852	0.0262993
	C=5	0.324884	0.267376	0.00892241	0.00286868	-0.0138387	0.617583	0.339063	0.153082	0.0932642	0.0555458	0.586365	0.630002	0.423534	0.097671	0.0199347
	C=6	0.345035	0.224969	0.018575	0.0120063	0.00336163	0.696771	0.270511	0.205051	0.1145	0.042385	0.718438	0.563074	0.408979	0.0937319	0.0549794
	C=7	0.319314	0.247422	0.0206072	0.00883969	0.000821399	0.456252	0.341782	0.130301	0.063466	0.0262611	0.596539	0.452393	0.348205	0.11025	0.0434267
	C=8	0.300396	0.243488	0.0200934	0.0119066	0.00291464	0.535246	0.328845	0.135956	0.0620036	0.0263623	0.597619	0.378131	0.3123	0.155263	0.0370624
m_mi_cnv	C=2	0.316145	0.772498	0.639268	-0.00924831	-0.00113898	0.776427	0.699094	0.456101	0.338394	0.160197	0.579543	0.235168	0.413947	-0.00120426	0.0235962
	C=3	0.100117	0.520719	0.0750909	-0.0208983	-0.00780404	0.398589	0.341948	0.264256	0.185806	0.10654	0.815895	0.635702	0.402833	0.0413335	0.0445186
	C=4	0.282961	0.418499	0.129916	0.0398734	0.00184017	0.452498	0.303551	0.24167	0.153277	0.0877782	0.824553	0.700495	0.313495	0.0849911	0.0110509
	C=5	0.266501	0.40047	0.214024	0.0327598	0.00423848	0.464729	0.288756	0.213494	0.106158	0.0539094	0.687098	0.6007	0.308936	0.104284	0.0415024
	C=6	0.314409	0.406689	0.256476	0.0534455	0.0108901	0.30376	0.201855	0.169097	0.0717691	0.0351782	0.518493	0.442932	0.425327	0.154402	0.0318467
	C=7	0.317532	0.431923	0.285333	0.0657877	0.00580198	0.418102	0.286305	0.131812	0.0660628	0.0414263	0.533943	0.438435	0.334865	0.138937	0.0453221
	C=8	0.25676	0.426116	0.357311	0.0738952	0.00800326	0.319434	0.223143	0.11563	0.0661082	0.0333301	0.45625	0.445694	0.263882	0.104693	0.0627287
m_me_cnv	C=2	0.317314	0.585413	0.518808	0.0081374	0.246913	0.929542	0.77225	0.70656	0.742383	0.6253	0.0723023	0.430374	0.0351996	0.144321	0.0943506
	C=3	0.25878	0.604724	0.443369	0.141491	0.283561	0.705421	0.523621	0.420336	0.336963	0.306882	0.874403	0.653215	0.27468	0.156747	0.0607639
	C=4	0.224677	0.310122	0.329655	0.121241	0.285914	0.40658	0.491666	0.370051	0.407914	0.211289	0.47329	0.327718	0.371238	0.299253	0.0549374
	C=5	0.550807	0.293571	0.481128	0.128703	0.231361	0.33309	0.344134	0.280341	0.318821	0.197103	0.803991	0.72025	0.58138	0.295443	0.111735
	C=6	0.417564	0.272746	0.353592	0.268121	0.238423	0.419092	0.288747	0.314025	0.261718	0.230623	0.786515	0.662857	0.616702	0.367189	0.125829
	C=7	0.606326	0.456983	0.405934	0.240332	0.388969	0.425322	0.313306	0.271695	0.238597	0.177649	0.539911	0.573019	0.416011	0.364029	0.118594
	C=8	0.610022	0.478305	0.398277	0.285223	0.391964	0.335403	0.247168	0.241981	0.177412	0.157717	0.547658	0.604845	0.490925	0.304228	0.130464
mi_me_cnv	C=2	0.65516	-0.0104089	-0.0197566	0.00661793	-0.00336529	0.753419	0.730506	0.448854	0.31797	0.198438	0.862588	0.75353	0.397489	0.00251896	0.0543737
	C=3	0.636964	-0.0121522	0.172314	-0.00455674	0.00256744	0.497831	0.428449	0.322289	0.144198	0.142681	0.70481	0.569847	0.457082	0.0365157	0.0205434
	C=4	0.614401	0.0580318	0.249141	0.0139261	0.0115282	0.569743	0.303913	0.226853	0.111356	0.0603639	0.73768	0.593908	0.263447	0.0826824	0.0362284
	C=5	0.663757	0.127814	0.244384	0.00680698	0.0202743	0.480519	0.313455	0.193565	0.119254	0.0357311	0.632734	0.395278	0.263755	0.0679418	0.0245941
	C=6	0.663922	0.529963	0.244819	0.00561834	0.0173171	0.434795	0.246156	0.180269	0.0958139	0.0272908	0.619504	0.338622	0.217406	0.0876005	0.0163459
	C=7	0.564344	0.524253	0.289303	0.0264265	0.0278507	0.36653	0.307331	0.107817	0.0595138	0.0261438	0.502518	0.364715	0.197415	0.058569	0.0130595
	C=8	0.561816	0.52602	0.315652	0.0298312	0.0272572	0.224422	0.247196	0.10848	0.0562331	0.0238752	0.399734	0.402067	0.15314	0.0534212	0.019729
m_mi_me_cnv	C=2	0.272136	0.498039	0.0948313	0.339165	-0.00119221	0.799975	0.717043	0.477296	0.342333	0.19138	0.866787	0.312591	0.592264	0.000370708	-0.00155176
	C=3	0.165613	0.441921	0.111038	0.292814	-0.00571755	0.393968	0.479701	0.333361	0.141655	0.103115	0.702742	0.587553	0.301707	0.0513419	0.0326823
	C=4	0.183382	0.475338	0.305652	0.276989	0.0120513	0.479109	0.320502	0.220727	0.139579	0.0129633	0.824197	0.660396	0.240192	0.085175	0.0155527
	C=5	0.352992	0.50371	0.282644	0.293687	0.022205	0.397685	0.338925	0.182015	0.0872096	0.0656129	0.646111	0.624621	0.432571	0.125104	0.0538206
	C=6	0.418245	0.559274	0.284756	0.199883	0.0174131	0.551896	0.23661	0.160866	0.0922197	0.0283866	0.660058	0.583524	0.334627	0.138557	0.0504353
	C=7	0.420159	0.56327	0.354231	0.224709	0.00969394	0.344895	0.273818	0.16892	0.0617129	0.0298421	0.630523	0.578168	0.417133	0.113772	0.0370262
	C=8	0.254961	0.56338	0.400368	0.246489	0.00456603	0.332763	0.200988	0.118854	0.061683	0.0117878	0.479008	0.357731	0.35999	0.148853	0.0458289
Methods		Subtype-GAN
Data Comb.	Noise Level	0.5	1	2	3	4
m_mi	C=2	0.245439	0.258656	0.254725	0.142625	0.18662
	C=3	0.457642	0.439076	0.41149	0.24889	0.215701
	C=4	0.388691	0.471196	0.416258	0.276096	0.185973
	C=5	0.523809	0.571166	0.306038	0.262884	0.159275
	C=6	0.424439	0.438691	0.277558	0.247174	0.151196
	C=7	0.46501	0.430611	0.260557	0.206977	0.139218
	C=8	0.389666	0.446082	0.289709	0.213269	0.136056
m_me	C=2	0.236748	0.227757	0.276735	0.210583	0.164943
	C=3	0.463782	0.393947	0.425335	0.353221	0.241112
	C=4	0.464704	0.436454	0.544961	0.31867	0.234689
	C=5	0.416805	0.450904	0.560902	0.272935	0.24125
	C=6	0.33826	0.434626	0.458481	0.292844	0.23948
	C=7	0.442048	0.364753	0.414611	0.355596	0.233089
	C=8	0.44442	0.327626	0.380597	0.313876	0.181284
m_cnv	C=2	0.258804	0.262037	0.235626	0.100643	0.0913293
	C=3	0.423049	0.388416	0.371075	0.300613	0.178888
	C=4	0.526559	0.531821	0.458728	0.258019	0.178172
	C=5	0.600466	0.479891	0.447149	0.275353	0.154361
	C=6	0.542319	0.537772	0.499482	0.260681	0.137347
	C=7	0.445709	0.478488	0.402074	0.283258	0.166508
	C=8	0.408705	0.406756	0.351028	0.280362	0.151771
mi_me	C=2	0.241878	0.227774	0.220936	0.0978221	0.0388858
	C=3	0.421623	0.335835	0.307539	0.155197	0.0556893
	C=4	0.504677	0.408619	0.281453	0.15535	0.0522355
	C=5	0.420232	0.416966	0.252431	0.146168	0.0465586
	C=6	0.408084	0.344209	0.221426	0.128411	0.0468069
	C=7	0.417654	0.362705	0.215202	0.122004	0.0419861
	C=8	0.392947	0.300579	0.177594	0.107158	0.043269
mi_cnv	C=2	0.294201	0.17257	0.107366	0.0872775	0.0534268
	C=3	0.352424	0.384767	0.228088	0.131453	0.0451016
	C=4	0.469488	0.311754	0.187664	0.110095	0.0481645
	C=5	0.617659	0.324793	0.204827	0.108284	0.0511886
	C=6	0.502279	0.364023	0.189975	0.102974	0.0442857
	C=7	0.358162	0.320116	0.19669	0.0941819	0.041075
	C=8	0.267804	0.257095	0.165862	0.0848798	0.0362117
me_cnv	C=2	0.291858	0.262282	0.216397	0.160978	0.157445
	C=3	0.38957	0.370423	0.415561	0.321479	0.222435
	C=4	0.498133	0.427991	0.398475	0.319333	0.237719
	C=5	0.664875	0.653237	0.371368	0.266819	0.249586
	C=6	0.538546	0.48708	0.380774	0.25199	0.22649
	C=7	0.462388	0.409901	0.323585	0.255774	0.256412
	C=8	0.325735	0.326403	0.315797	0.216902	0.181475
m_mi_me	C=2	0.25606	0.216462	0.170163	0.191313	0.149469
	C=3	0.422399	0.393047	0.442145	0.373662	0.277941
	C=4	0.482905	0.406408	0.39977	0.338634	0.259218
	C=5	0.541218	0.376708	0.30564	0.335484	0.210948
	C=6	0.458651	0.356091	0.300582	0.279783	0.192208
	C=7	0.501551	0.344544	0.35587	0.281212	0.189579
	C=8	0.439223	0.359031	0.346884	0.269871	0.176917
m_mi_cnv	C=2	0.214887	0.211337	0.208311	0.165824	0.119067
	C=3	0.43048	0.371643	0.382298	0.34584	0.198505
	C=4	0.58686	0.399677	0.411979	0.324285	0.215031
	C=5	0.588551	0.308239	0.356298	0.305961	0.194946
	C=6	0.506501	0.363912	0.445002	0.287837	0.180964
	C=7	0.414628	0.298551	0.382387	0.260537	0.154984
	C=8	0.347073	0.277744	0.32111	0.2331	0.159902
m_me_cnv	C=2	0.27745	0.199607	0.199745	0.150017	0.136215
	C=3	0.465051	0.365478	0.400339	0.290921	0.283749
	C=4	0.507756	0.371277	0.356061	0.236416	0.264273
	C=5	0.516477	0.380917	0.355699	0.231841	0.251166
	C=6	0.481683	0.356194	0.349908	0.220096	0.251291
	C=7	0.525368	0.422732	0.35024	0.224628	0.273007
	C=8	0.455624	0.337949	0.349591	0.241586	0.213602
mi_me_cnv	C=2	0.247533	0.199451	0.200828	0.0954183	0.0554834
	C=3	0.435732	0.449676	0.365036	0.12414	0.0722675
	C=4	0.481502	0.447476	0.275488	0.113044	0.0702686
	C=5	0.402283	0.443016	0.276995	0.101889	0.064193
	C=6	0.334876	0.326443	0.224711	0.0967582	0.0520407
	C=7	0.373157	0.282479	0.23356	0.112243	0.0693288
	C=8	0.324416	0.281467	0.215602	0.0885626	0.0535283
m_mi_me_cnv	C=2	0.236973	0.222163	0.208784	0.178029	0.0930088
	C=3	0.337878	0.372407	0.333026	0.280266	0.18953
	C=4	0.360323	0.443298	0.402294	0.2317	0.146181
	C=5	0.455637	0.556844	0.319513	0.221952	0.120525
	C=6	0.392681	0.46126	0.251945	0.223027	0.109216
	C=7	0.293807	0.443347	0.302767	0.230887	0.125874
	C=8	0.327568	0.342576	0.182654	0.176313	0.0948987
Dataset #2 COAD Noise Datasets ARI
Methods		iClusterBayes					LRAcluster					SNF
Data Comb.	Noise Level	0.5	1	2	3	4	0.5	1	2	3	4	0.5	1	2	3	4
m_mi	C=2	0.767036	0.840838	0.661977	0.534132	0.544341	0.447102	0.932216	0.828697	0.199758	0.596449	0.945567	0.82866	0.696205	0.606959	0.335034
	C=3	0.794526	0.963842	0.715765	0.701342	0.647108	0.989336	0.916593	0.90815	0.869161	0.72351	0.859301	0.85802	0.72717	0.641825	0.376211
	C=4	0.373245	0.655217	0.361043	0.550869	0.313759	0.955333	0.912776	0.781142	0.778384	0.59637	0.888019	0.638299	0.36719	0.371922	0.1951
	C=5	0.580587	0.240866	0.243921	0.176544	0.110085	0.939244	0.92361	0.818642	0.742739	0.531299	0.864548	0.7062	0.419518	0.307204	0.172328
	C=6	0.294368	0.145335	0.0945158	0.201418	0.185249	0.657457	0.829946	0.684682	0.726813	0.386787	0.81577	0.695288	0.430649	0.339691	0.130681
	C=7	0.330066	0.0663227	0.0400255	0.0744572	0.0823115	0.925825	0.670877	0.51658	0.642936	0.496861	0.602987	0.478697	0.338738	0.2306	0.113709
	C=8	0.278886	0.0455113	0.0303985	0.120141	0.0784292	0.902957	0.765255	0.689721	0.463079	0.412969	0.618978	0.468718	0.401195	0.23189	0.0921898
m_me	C=2	0.972564	0.918814	0.879588	0.879489	0.828538	0.97257	0.97257	0.932165	0.879495	0.816024	0.959037	0.879647	0.816158	0.767066	0.743028
	C=3	0.529137	0.68076	0.543048	0.672294	0.695141	0.97102	0.944817	0.86471	0.783974	0.771251	0.940688	0.870884	0.768918	0.635178	0.570683
	C=4	0.51691	0.367863	0.348785	0.339897	0.371382	0.94627	0.854136	0.887265	0.796017	0.706923	0.880181	0.858872	0.575394	0.41619	0.388347
	C=5	0.46586	0.0710373	0.244825	0.177227	0.300753	0.965047	0.956416	0.776458	0.778557	0.637825	0.954404	0.828708	0.583808	0.373366	0.330317
	C=6	0.417242	0.198406	0.144817	0.159372	0.197843	0.892853	0.866704	0.621976	0.701425	0.605062	0.929435	0.831558	0.635003	0.555713	0.332579
	C=7	0.179152	0.0563149	0.0232976	0.110363	0.142274	0.639256	0.753699	0.766448	0.682681	0.638815	0.776911	0.760852	0.601737	0.400648	0.275809
	C=8	0.418129	0.0459575	0.0374353	0.0994814	0.0817862	1	0.914971	0.577312	0.723105	0.635289	0.892685	0.850685	0.649435	0.431897	0.263218
m_cnv	C=2	1	0.932219	0.918947	0.803767	0.743095	0.972603	0.841311	0.918947	0.816186	0.767084	0.972494	0.958893	0.80347	0.662076	0.707548
	C=3	0.643774	0.827471	0.707749	0.556885	0.649564	0.904785	0.928353	0.83634	0.781851	0.790923	0.939906	0.885384	0.750519	0.647023	0.515847
	C=4	0.849857	0.84384	0.705693	0.649283	0.552257	0.95632	0.96574	0.725747	0.527131	0.369119	0.626401	0.494983	0.429041	0.39959	0.319335
	C=5	0.531121	0.50317	0.447038	0.452771	0.388094	0.988459	0.94449	0.748766	0.582618	0.408504	0.571145	0.544026	0.450893	0.435095	0.315286
	C=6	0.491706	0.424654	0.386144	0.443132	0.27119	0.93842	0.968333	0.835549	0.599497	0.381833	0.723869	0.552936	0.423693	0.377265	0.320667
	C=7	0.33871	0.200262	0.243251	0.224359	0.188852	0.932882	0.92256	0.578267	0.501512	0.405515	0.685362	0.502453	0.42586	0.350471	0.269683
	C=8	0.216727	0.121166	0.100456	0.170443	0.128649	0.948246	0.60246	0.664485	0.480896	0.387382	0.572049	0.483979	0.367842	0.270141	0.251138
mi_me	C=2	0.879684	0.841282	0.791448	0.767067	0.803758	0.892672	0.82867	0.892679	0.484577	0.791426	0.730011	0.730011	0.563016	0.456186	0.334283
	C=3	0.894063	0.919304	0.715569	0.66298	0.642593	0.969779	0.937778	0.858831	0.73551	0.631106	0.917021	0.811724	0.367294	0.325942	0.336139
	C=4	0.39964	0.254151	0.231694	0.259812	0.351678	0.85268	0.569953	0.803952	0.300699	0.581604	0.91537	0.627845	0.241394	0.266342	0.275653
	C=5	0.617167	0.158025	0.0847155	0.22442	0.231536	0.989729	0.902984	0.799863	0.744664	0.652188	0.609346	0.476146	0.411882	0.24817	0.147504
	C=6	0.50058	0.0447147	0.0790521	0.122152	0.147993	1	0.946353	0.794107	0.743057	0.528035	0.826981	0.645867	0.508697	0.244508	0.14891
	C=7	0.387318	0.0444019	0.0288939	0.0338961	0.10122	0.959558	0.854122	0.788069	0.682135	0.519675	0.670976	0.588098	0.361783	0.20577	0.141785
	C=8	0.499813	0.0205753	0.030448	0.0742254	0.0492694	0.641426	0.597958	0.547404	0.509775	0.553635	0.572958	0.502362	0.3718	0.152428	0.161988
mi_cnv	C=2	0.985624	0.413606	0.382062	0.0206693	0.0388399	0.949583	0.966741	0.774256	0.902485	0.841149	0.931312	0.765467	0.503987	0.273692	0.123724
	C=3	0.945917	0.79281	0.855496	0.712078	0.674956	0.97357	0.944972	0.87539	0.75191	0.728426	0.713165	0.574453	0.371043	0.353331	0.20782
	C=4	0.634376	0.471648	0.480884	0.480966	0.409351	0.953501	0.847672	0.635369	0.74163	0.687081	0.812628	0.497759	0.388096	0.266014	0.243825
	C=5	0.558721	0.352218	0.368146	0.190962	0.366395	0.948709	0.72292	0.684734	0.782348	0.643918	0.664228	0.661971	0.371098	0.233809	0.222038
	C=6	0.558754	0.311435	0.229278	0.247048	0.341844	0.927097	0.929856	0.843894	0.674639	0.6302	0.576218	0.475646	0.32867	0.218906	0.142583
	C=7	0.644285	0.178638	0.142511	0.256095	0.159326	0.923205	0.899142	0.53265	0.702914	0.638186	0.53035	0.478458	0.385577	0.210778	0.111167
	C=8	0.361302	0.183385	0.14005	0.180203	0.113245	0.955408	0.928966	0.565159	0.843846	0.600426	0.440845	0.45752	0.359573	0.223128	0.118208
me_cnv	C=2	0.932219	0.932219	0.854009	0.779218	0.841307	0.905771	0.918948	0.892688	0.803772	0.803767	0.945344	0.840894	0.742783	0.639724	0.544355
	C=3	0.481108	0.493112	0.272713	0.35851	0.362748	0.911795	0.891491	0.764949	0.545834	0.531088	0.904465	0.874213	0.792766	0.670348	0.597472
	C=4	0.422784	0.386107	0.304562	0.294809	0.340963	0.888303	0.885975	0.807874	0.74094	0.488305	0.388599	0.342457	0.265536	0.275506	0.255049
	C=5	0.518606	0.449744	0.460394	0.41336	0.354459	0.924	0.909608	0.818791	0.675786	0.57827	0.580772	0.474183	0.393433	0.393239	0.247687
	C=6	0.321856	0.175445	0.227712	0.239511	0.223719	0.950376	0.913602	0.812592	0.778466	0.56823	0.495164	0.414455	0.378481	0.340667	0.204531
	C=7	0.335807	0.104949	0.251255	0.23121	0.270061	0.885003	0.915718	0.718186	0.597442	0.595211	0.778617	0.718787	0.608423	0.313291	0.25908
	C=8	0.312433	0.0736465	0.0633215	0.169079	0.0822486	0.871482	0.633722	0.667533	0.498535	0.605222	0.749304	0.546531	0.505005	0.351146	0.2322
m_mi_me	C=2	0.972564	0.958993	0.918877	0.866591	0.816054	0.959001	0.94552	0.879649	0.866647	0.803635	0.564638	0.730973	0.719175	0.484494	0.534012
	C=3	0.949101	0.508081	0.882298	0.716959	0.643124	0.815526	0.855195	0.905341	0.851001	0.773473	0.656426	0.87826	0.699316	0.621184	0.517145
	C=4	0.550666	0.39283	0.338698	0.32743	0.306399	0.888407	0.90887	0.897756	0.80508	0.322273	0.857339	0.687856	0.347532	0.329387	0.274469
	C=5	0.283677	0.173865	0.153893	0.272157	0.205761	0.821946	0.886422	0.838014	0.781639	0.654778	0.94588	0.794975	0.534906	0.385294	0.229468
	C=6	0.337668	0.0988179	0.0842526	0.247616	0.164446	0.925628	0.810068	0.669086	0.670638	0.631186	0.663052	0.605413	0.520653	0.398834	0.230647
	C=7	0.278698	0.0494183	0.0385794	0.190386	0.0838713	0.87461	0.88083	0.758151	0.68949	0.664575	0.742243	0.657809	0.502784	0.294643	0.185877
	C=8	0.0759012	0.0106601	0.0464674	0.125289	0.0935994	0.978182	0.839983	0.572534	0.666205	0.643486	0.727533	0.596985	0.534843	0.361943	0.147532
m_mi_cnv	C=2	0.932219	0.90577	0.892687	0.779215	0.719495	0.986254	0.918948	0.8797	0.828699	0.7431	0.95891	0.905492	0.840983	0.62868	0.639487
	C=3	0.849431	0.424792	0.763142	0.738124	0.605351	0.928801	0.939297	0.538	0.810666	0.426183	0.693882	0.677598	0.632923	0.547515	0.389756
	C=4	0.776391	0.850596	0.698441	0.749452	0.533547	0.937303	0.772449	0.706656	0.712397	0.623304	0.655773	0.577719	0.459325	0.436092	0.364287
	C=5	0.812097	0.544141	0.503382	0.467992	0.446453	0.946472	0.67908	0.678941	0.631634	0.51216	0.799279	0.684621	0.567078	0.441314	0.341656
	C=6	0.412139	0.294466	0.273937	0.300971	0.215471	0.959353	0.563805	0.523049	0.433441	0.62268	0.64425	0.592681	0.482662	0.406826	0.261333
	C=7	0.384222	0.260487	0.185549	0.26244	0.198068	0.946031	0.91056	0.743655	0.407834	0.52498	0.58163	0.592815	0.476671	0.326124	0.135489
	C=8	0.363512	0.213781	0.190907	0.209574	0.122555	0.901701	0.814646	0.613867	0.629743	0.395339	0.547307	0.573195	0.466948	0.263372	0.246276
m_me_cnv	C=2	0.892674	0.866787	0.866791	0.853989	0.719463	0.932204	0.972594	0.892643	0.879645	0.853956	0.932117	0.945483	0.828518	0.779102	0.742945
	C=3	0.730728	0.582225	0.500057	0.538803	0.555728	0.969056	0.953464	0.840166	0.69944	0.702678	0.940247	0.840824	0.849298	0.644755	0.657451
	C=4	0.830225	0.399495	0.412347	0.492785	0.435453	0.356211	0.981904	0.385265	0.35827	0.332682	0.848454	0.777765	0.708001	0.533558	0.579607
	C=5	0.434906	0.323178	0.268255	0.445034	0.457674	0.51163	0.652561	0.50406	0.569435	0.508523	0.776428	0.784305	0.654279	0.46228	0.342573
	C=6	0.45176	0.247119	0.291789	0.356336	0.272915	0.93273	0.950234	0.823018	0.775272	0.662098	0.560607	0.515201	0.478066	0.395743	0.341669
	C=7	0.286008	0.0327543	0.15162	0.196482	0.179627	0.796244	0.829839	0.82185	0.777524	0.632184	0.757372	0.702162	0.609557	0.416859	0.301314
	C=8	0.201572	0.136586	0.0879526	0.104393	0.199869	0.885125	0.882047	0.843904	0.764632	0.707127	0.687954	0.63467	0.568596	0.431937	0.293184
mi_me_cnv	C=2	0.972603	0.945585	0.841307	0.816191	0.791443	0.918948	0.945586	0.90577	0.767091	0.816186	0.931739	0.853275	0.815425	0.617502	0.564843
	C=3	0.352622	0.411294	0.458814	0.553771	0.565962	0.930086	0.897596	0.757606	0.580587	0.525523	0.827081	0.337312	0.465888	0.539342	0.254516
	C=4	0.331338	0.365997	0.445053	0.434669	0.399384	0.916797	0.899945	0.702207	0.78831	0.515522	0.798085	0.79118	0.589316	0.591167	0.430603
	C=5	0.442535	0.378983	0.343048	0.412735	0.432891	0.957116	0.948547	0.808912	0.6937	0.629272	0.339747	0.385701	0.326185	0.284913	0.20402
	C=6	0.318842	0.217211	0.23984	0.245445	0.229745	0.961254	0.941153	0.769471	0.717699	0.553119	0.577519	0.567	0.425008	0.336009	0.190057
	C=7	0.307163	0.175208	0.197493	0.147665	0.182261	0.934793	0.948651	0.715271	0.608858	0.576233	0.578895	0.648509	0.450997	0.29371	0.197526
	C=8	0.212768	0.0811514	0.0936502	0.161946	0.182393	0.87957	0.644274	0.578742	0.540324	0.590684	0.570638	0.452639	0.359037	0.294693	0.182227
m_mi_me_cnv	C=2	0.972601	0.879678	0.853987	0.853982	0.743068	0.945572	0.972594	0.905727	0.879645	0.866764	0.918658	0.905525	0.791007	0.673294	0.696149
	C=3	0.860421	0.774247	0.692907	0.528362	0.664076	0.975721	0.978161	0.961104	0.726397	0.675514	0.883458	0.742815	0.691538	0.596967	0.582568
	C=4	0.360204	0.377223	0.394739	0.336487	0.34359	0.972711	0.972528	0.69598	0.663445	0.327711	0.853386	0.817582	0.654735	0.619722	0.406042
	C=5	0.540405	0.47724	0.46944	0.471743	0.383947	0.955079	0.817983	0.801326	0.788407	0.613871	0.681489	0.780111	0.603917	0.564099	0.306366
	C=6	0.32703	0.208539	0.228538	0.274501	0.247228	0.956244	0.850961	0.844196	0.783254	0.47162	0.614711	0.565189	0.451616	0.367224	0.2596
	C=7	0.222625	0.16572	0.103188	0.325798	0.171122	0.947056	0.866944	0.844405	0.819871	0.627844	0.643369	0.733312	0.477858	0.317059	0.277602
	C=8	0.197054	0.0660189	0.0675038	0.20227	0.146534	0.942215	0.929274	0.895025	0.794461	0.560578	0.639475	0.561454	0.48905	0.298187	0.215704
Methods		PFA					PINS					NEMO
Data Comb.	Noise Level	0.5	1	2	3	4	0.5	1	2	3	4	0.5	1	2	3	4
m_mi	C=2	-0.00247397	-0.00200155	0.0111014	-0.00315361	-0.00334425	0.541874	0.200284	0.164448	-0.0099073	0.0097462	0.932216	0.841308	0.779177	0.650912	0.212507
	C=3	0.0014701	-0.00347159	0.00518108	-0.00563648	-0.00233154						0.907376	0.909038	0.782057	0.677676	0.468708
	C=4	0.00629002	-0.00463181	-0.00119416	0.0044728	0.00144959						0.874797	0.770263	0.362894	0.376255	0.211648
	C=5	0.00252542	-0.00594287	0.00472728	-0.00324947	0.0139923						0.9329	0.809803	0.624477	0.241842	0.225786
	C=6	0.0064066	-0.00511836	0.000966778	-0.00220382	0.00887881						0.884147	0.777127	0.458588	0.379878	0.14135
	C=7	0.0111241	-0.00438089	0.00771545	-0.00336913	0.00258377						0.604723	0.511214	0.360527	0.324496	0.142531
	C=8	0.00792919	-0.00575978	0.00141802	-0.000505572	0.00319739						0.59083	0.558305	0.288815	0.245236	0.0756695
m_me	C=2	0.00599899	0.00416002	0.000768892	-0.00433735	0.00158089	0.904391	0.217356	0.2015	0.1736	0.0731243	0.932188	0.945545	0.853982	0.767026	0.731124
	C=3	0.00762957	0.0103995	-0.00261025	0.0337465	0.0074398						0.937536	0.956806	0.833885	0.743117	0.653201
	C=4	0.0424251	-0.00357058	0.00801522	0.0104538	0.00313369						0.884897	0.862307	0.717836	0.447124	0.389136
	C=5	0.0717091	0.00195542	0.00527272	0.00384686	-0.00679973						0.917724	0.758309	0.459306	0.376245	0.298177
	C=6	0.063734	-0.00455668	0.00492871	0.0104644	0.00666228						0.897138	0.839405	0.645225	0.4007	0.322908
	C=7	0.0503849	0.00347409	0.0129369	0.00404696	0.00860697						0.805279	0.662081	0.549829	0.410369	0.306236
	C=8	0.103033	-0.000913275	-0.000479371	0.00764551	0.00368293						0.717771	0.668053	0.534461	0.410222	0.315295
m_cnv	C=2	0.00686143	0.0126855	-0.00259807	-0.00236009	0.0135537	0.626138	0.42459	0.265744	-0.00380883	0.0044442	0.932017	0.866603	0.803541	0.617995	0.66196
	C=3	0.21484	0.0421539	0.00643461	0.00260884	0.0232055						0.89944	0.842998	0.662354	0.641392	0.517577
	C=4	0.168808	0.00976087	0.00148182	0.00106162	0.0077442						0.904587	0.862881	0.720058	0.63203	0.535468
	C=5	0.148161	0.00604802	0.00453859	-0.00550998	0.00900256						0.648023	0.582236	0.556415	0.4858	0.423495
	C=6	0.098741	0.0177963	0.00138796	-0.00900147	0.00749359						0.594893	0.608482	0.578915	0.482696	0.454391
	C=7	0.18141	0.0155892	-0.00461477	-0.0038443	-0.00185081						0.609182	0.598311	0.484157	0.44576	0.403487
	C=8	0.104125	0.0130719	0.00407465	-0.000726961	-0.00390951						0.707162	0.587677	0.505077	0.400831	0.361898
mi_me	C=2	-0.00233459	1.6564e-05	-0.00313093	-0.0035382	0.00523265	0.711072	0.149498	0.0675397	0.0649093	0.0572242	0.87946	0.77789	0.660278	0.359016	0.327152
	C=3	0.00205249	0.00722025	-0.00570788	-0.00469461	0.00526495						0.915561	0.82659	0.60339	0.496818	0.420215
	C=4	0.00138467	0.0181282	0.0105032	0.00146403	-0.00649884						0.90977	0.559687	0.439042	0.2747	0.236326
	C=5	0.0305948	0.00902303	2.44368e-05	-0.000353029	-0.00702965						0.839527	0.688329	0.402732	0.307349	0.224865
	C=6	0.0202802	0.012225	0.00481583	-0.00415337	-0.00387766						0.734978	0.663704	0.452175	0.31982	0.210343
	C=7	0.0181702	0.00750461	0.00331048	-0.000867659	-0.00106001						0.735339	0.630706	0.388504	0.232604	0.231065
	C=8	0.028179	0.000107439	-0.00314203	0.00410366	0.000929024						0.599982	0.534239	0.388292	0.209881	0.262621
mi_cnv	C=2	0.0121314	-0.00285513	0.00278292	-0.00099193	-0.00342278	0.543765	0.548061	-0.00900978	0.31692	0.284024	0.790139	0.695199	0.475417	0.237213	0.0309889
	C=3	0.0409914	0.000893632	-0.00327043	0.000685836	-0.00264008						0.756954	0.619014	0.25385	0.221365	0.168723
	C=4	0.035049	-0.0037094	0.000726888	0.010277	-0.000894087						0.37735	0.352557	0.283565	0.19272	0.139973
	C=5	0.0712489	-0.005227	-0.00147071	0.0116303	0.00188426						0.758232	0.402295	0.437728	0.299166	0.231962
	C=6	0.055873	-0.00582758	-0.00452484	-0.0029292	-0.00476691						0.721905	0.447454	0.35071	0.226966	0.21391
	C=7	0.0507626	-0.00415069	0.00187883	-0.0018227	-0.0039018						0.682844	0.528089	0.394017	0.229048	0.10908
	C=8	0.0630394	0.000229427	-0.00799954	0.00671523	-0.00229628						0.52415	0.312997	0.386885	0.212548	0.159667
me_cnv	C=2	0.163834	-0.00100681	0.00443248	-0.000500685	-0.00169712	0.612115	0.0664246	-0.023696	0.137782	0.0187398	0.918724	0.766867	0.731087	0.607177	0.564735
	C=3	0.288665	-0.000401093	0.00251831	0.00173152	-0.000899148						0.839459	0.773309	0.723519	0.625768	0.580876
	C=4	0.179388	0.00254944	-0.000433348	0.00325416	-0.00428114						0.354346	0.371672	0.296897	0.292009	0.308773
	C=5	0.129802	0.0122253	0.00297455	0.00472243	-0.000929773						0.549488	0.663019	0.554407	0.43722	0.278191
	C=6	0.0379082	0.00496783	-0.00358819	0.00285136	0.00963739						0.435924	0.412251	0.451177	0.328856	0.439413
	C=7	0.179299	0.00318498	0.00561282	0.0049403	0.00442277						0.697033	0.679355	0.357674	0.38894	0.314171
	C=8	0.254066	0.0120988	-0.00611142	0.00472236	-0.00673459						0.567868	0.541992	0.374571	0.306771	0.272341
m_mi_me	C=2	0.00105922	-0.00277958	0.0183426	-0.00245867	0.0245406	0.473914	0.214075	0.154131	0.273902	0.0533717	0.649812	0.828507	0.585599	0.534093	0.514187
	C=3	0.0260549	0.0184971	-0.00249441	0.00754111	-0.000650781						0.499949	0.809123	0.838013	0.714512	0.524815
	C=4	0.0351309	-0.0015775	0.00617054	0.0022775	0.00125458						0.848043	0.627856	0.348152	0.287612	0.325303
	C=5	0.00633085	0.00262558	0.000386877	-0.00526974	-0.000266675						0.952306	0.789039	0.55379	0.391109	0.269694
	C=6	0.0524383	-0.00682078	0.00590884	-0.00212952	-0.00423341						0.802972	0.702484	0.498537	0.435496	0.244207
	C=7	0.00415393	0.00288849	-0.00273957	-0.000433434	0.00395202						0.539258	0.55204	0.434971	0.372759	0.248318
	C=8	0.0199476	4.38021e-05	-0.00153132	-0.0028429	0.00788714						0.581199	0.561757	0.477291	0.348686	0.228109
m_mi_cnv	C=2	0.0830711	0.0225401	0.00463201	0.0026287	-0.00482327	0.365353	0.123945	0.00108465	0.10667	0.0794923	0.945468	0.905606	0.803524	0.673337	0.707534
	C=3	0.0416641	-0.00175141	0.0171343	-0.00451493	-0.00109486						0.908566	0.851256	0.7259	0.590797	0.491497
	C=4	0.0680734	0.00299421	0.00540261	-0.00413213	0.000941295						0.709009	0.760443	0.445796	0.432052	0.400436
	C=5	0.0771245	0.0134219	0.00374112	-0.00672086	-0.00219606						0.657377	0.555875	0.461634	0.531809	0.403242
	C=6	0.140411	0.0197877	0.0111849	-0.0076032	-0.00661317						0.76541	0.741579	0.4916	0.447375	0.339982
	C=7	0.100416	0.0100642	0.00993424	0.000367353	0.00238698						0.827679	0.683756	0.446416	0.488097	0.353588
	C=8	0.0478351	0.020346	0.00651792	0.000908356	-0.00380646						0.811587	0.673423	0.397689	0.383008	0.242069
m_me_cnv	C=2	0.0986855	-0.00397885	-0.00372385	-0.003805	-0.00263261	0.956943	0.153152	0.252952	0.131987	0.145621	0.958984	0.879611	0.80368	0.696245	0.791336
	C=3	0.0663136	-0.00778604	0.0328108	-0.00395961	-0.00705427						0.704003	0.68253	0.442248	0.335727	0.244063
	C=4	0.0587789	0.0147246	0.00125821	0.00207428	-0.0093767						0.887871	0.758498	0.450353	0.609717	0.604554
	C=5	0.135649	-0.00431329	-0.00197962	-0.00669809	-0.00503964						0.839464	0.831543	0.647451	0.45472	0.461068
	C=6	0.0875954	-0.00761221	-0.000609517	-0.00909313	-0.00336033						0.826689	0.721322	0.631274	0.470156	0.430273
	C=7	0.273254	-0.0165985	0.0103141	0.0134027	-0.00188855						0.645872	0.545029	0.447693	0.397774	0.36794
	C=8	0.179516	-0.0142495	0.0217319	-0.00932733	-0.00491247						0.686703	0.53565	0.521188	0.398311	0.34727
mi_me_cnv	C=2	-0.0010378	0.0131853	-0.0027241	-0.00253778	-0.00527892	0.451139	0.118019	0.0190304	0.055756	0.175342	0.972451	0.918628	0.742705	0.718971	0.524226
	C=3	0.12579	0.0101969	0.00280669	-0.00497442	-0.00573568						0.926736	0.837486	0.44273	0.346177	0.170679
	C=4	0.174329	0.00691003	0.00263121	-0.00482891	0.000868309						0.433916	0.775371	0.67051	0.56754	0.43261
	C=5	0.131652	0.0106414	0.00236269	-0.00201919	-0.000336443						0.340088	0.515721	0.35179	0.427607	0.329106
	C=6	0.133649	0.00386302	0.00115669	0.00326039	0.00190167						0.751499	0.671716	0.438346	0.372356	0.350027
	C=7	0.116679	0.0129816	0.0151498	-0.00187569	-0.00229774						0.720652	0.520561	0.415482	0.406198	0.274324
	C=8	0.131474	0.0112654	0.0147098	-0.000422676	0.000301134						0.725393	0.539382	0.343791	0.308864	0.257657
m_mi_me_cnv	C=2	0.108329	0.00166601	0.000987055	-0.000524423	-0.00286221	0.910077	0.0723475	0.108647	0.302455	0.120183	0.958952	0.932101	0.766912	0.719382	0.719382
	C=3	0.093894	-0.00301172	0.00461887	-0.00499617	-0.00226677						0.534858	0.858458	0.770625	0.438861	0.485046
	C=4	0.064691	0.0359152	-0.00707777	0.00226108	-0.00409034						0.641844	0.67302	0.413719	0.557214	0.469732
	C=5	0.145461	0.0253194	-0.00400307	0.00773463	-0.00176842						0.519399	0.765554	0.617567	0.374844	0.374168
	C=6	0.0810091	0.0114437	0.00620391	0.00286438	-0.000787559						0.860343	0.626629	0.502603	0.45331	0.331913
	C=7	0.100344	0.0130987	-0.00419253	0.00786414	0.00554759						0.811283	0.712076	0.558775	0.438515	0.298076
	C=8	0.0796843	0.0177583	0.0042939	0.00811084	0.00337694						0.543145	0.548476	0.422504	0.416601	0.307628
Methods		moCluster					CIMLR					multiNMF
Data Comb.	Noise Level	0.5	1	2	3	4	0.5	1	2	3	4	0.5	1	2	3	4
m_mi	C=2	-0.0915009	0.113321	-0.00744569	0.0140372	-0.00378829	0.892686	0.575239	0.343047	0.295894	0.0248519	0.892687	0.779216	0.575302	0.11272	-0.00314917
	C=3	0.193296	0.387418	0.0783394	0.00477801	0.0172089	0.518391	0.309509	0.269601	0.159152	0.0480903	0.914395	0.475929	0.403369	0.152835	0.0846941
	C=4	0.180365	0.425329	0.0960517	0.0101444	0.0116922	0.305057	0.251616	0.192508	0.0930103	0.0252379	0.758409	0.665495	0.346707	0.18683	0.0520586
	C=5	0.254425	0.406829	0.078662	0.0206466	0.00787017	0.461885	0.221166	0.112194	0.0539125	0.0281429	0.663945	0.452575	0.350921	0.0963396	0.0419647
	C=6	0.289302	0.430833	0.0760498	0.026514	0.00313448	0.295113	0.214714	0.12106	0.0458451	0.0289463	0.553556	0.505006	0.298508	0.142485	0.0524286
	C=7	0.330647	0.32421	0.0706197	0.0316158	0.000208322	0.363359	0.211671	0.124155	0.0420329	0.0223111	0.375312	0.345004	0.217455	0.135	0.0466179
	C=8	0.306532	0.363392	0.0457502	0.0302632	-0.00129967	0.484027	0.248036	0.133831	0.0430949	0.0161675	0.558553	0.531534	0.267235	0.122864	0.0520681
m_me	C=2	0.28469	0.688434	0.219345	0.408541	0.246651	0.918897	0.892622	0.853945	0.684781	0.47411	0.779133	0.639815	0.046656	0.181715	0.0989983
	C=3	0.360406	0.500952	0.234539	0.326478	0.0508609	0.963125	0.938299	0.751928	0.657179	0.420584	0.96713	0.840494	0.217538	0.273024	0.0765719
	C=4	0.268302	0.50989	0.249332	0.346647	0.113429	0.583847	0.468702	0.288056	0.4385	0.299281	0.928451	0.939101	0.720851	0.197679	0.0370347
	C=5	0.271911	0.430707	0.22672	0.197148	0.152702	0.866159	0.559089	0.500054	0.350506	0.219459	0.907773	0.583644	0.784163	0.307657	0.0774628
	C=6	0.352458	0.470101	0.251127	0.217424	0.177945	0.580258	0.528571	0.407914	0.317178	0.149663	0.900975	0.801796	0.715114	0.422092	0.0975433
	C=7	0.358067	0.507238	0.260901	0.229557	0.167879	0.787826	0.57981	0.477323	0.296694	0.167483	0.621393	0.466946	0.61677	0.377504	0.105431
	C=8	0.390771	0.500554	0.306787	0.221045	0.177003	0.781727	0.609052	0.51287	0.306841	0.18381	0.513338	0.492772	0.417966	0.338693	0.204204
m_cnv	C=2	0.0138259	-0.0021233	-0.0375077	-0.0128083	-0.0251874	0.752426	0.413751	0.511642	0.295042	0.188479	0.311332	0.504235	0.41986	0.0183018	-0.00411383
	C=3	0.0354885	-0.00984618	-0.0115466	-0.00840141	7.49e-05	0.346573	0.257289	0.254734	0.239587	0.161329	0.342358	0.857152	0.247881	0.0773864	0.026544
	C=4	-0.0225258	-0.0353324	0.00357639	-0.00836099	-0.00640921	0.588012	0.443547	0.423241	0.351611	0.229421	0.912175	0.888435	0.537795	0.0186344	0.0164928
	C=5	0.0593582	0.0403644	0.116392	-0.00533859	0.0409023	0.380333	0.374929	0.251805	0.222463	0.157516	0.866562	0.815384	0.620033	0.22592	0.0210823
	C=6	0.0597121	0.0744363	0.127058	0.00673435	0.0519008	0.376329	0.378443	0.309663	0.258421	0.145261	0.579873	0.685313	0.585974	0.335472	0.0508694
	C=7	0.107295	0.0815044	0.125752	0.00602082	0.0551081	0.544851	0.340312	0.314481	0.291941	0.145674	0.493648	0.495835	0.512204	0.277485	0.0721376
	C=8	0.112279	0.127252	0.050749	0.0237351	0.0161628	0.570023	0.309017	0.281707	0.181338	0.123344	0.460901	0.534449	0.342363	0.275208	0.107594
mi_me	C=2	-0.0717949	0.0061029	0.0131954	0.120242	-0.000778576	0.649976	0.628644	0.367599	0.27372	0.0597864	0.905772	0.767075	0.514142	0.0435684	0.0435727
	C=3	0.0783858	0.0542172	0.0574492	0.110176	0.00606388	0.481337	0.301205	0.228913	0.170043	0.0516966	0.314932	0.400622	0.311711	0.0837221	0.0789783
	C=4	0.306072	0.0687796	0.0789384	0.125209	0.0217615	0.469626	0.351222	0.205892	0.0838359	0.0298392	0.402647	0.380882	0.217986	0.118688	0.116525
	C=5	0.310629	0.0915988	0.036301	0.0632259	0.0440282	0.299466	0.202798	0.0736294	0.0289547	0.0345462	0.481733	0.320133	0.232351	0.075849	0.0669332
	C=6	0.220424	0.081755	0.0671033	0.0512026	0.0259967	0.305687	0.268974	0.156574	0.0630316	0.00926564	0.499384	0.342987	0.170852	0.0663076	0.0312567
	C=7	0.212004	0.096905	0.0688153	0.0470032	0.0211009	0.485788	0.217031	0.156622	0.037079	0.0190097	0.400601	0.269132	0.16791	0.0806413	0.0439151
	C=8	0.228823	0.18274	0.032947	0.0465115	0.0110814	0.480787	0.233343	0.0965328	0.0237233	0.0195468	0.322561	0.234383	0.129272	0.0587038	0.0543365
mi_cnv	C=2	0.621344	-0.0131197	-0.0794996	-0.00107529	0.149244	0.0440801	-0.0022096	0.0020308	-0.0178848	0.00110804	0.905772	0.743054	0.554546	0.212225	0.187685
	C=3	0.329507	0.0023316	0.105494	0.0137264	0.125223	0.433817	0.376342	0.210296	0.12145	0.0659599	0.559219	0.410142	0.302462	0.149982	0.0628559
	C=4	0.385492	-0.00688732	0.0269113	0.0269605	0.0663881	0.333611	0.287127	0.119684	0.07545	0.0115853	0.388625	0.542383	0.178773	0.143383	0.0428875
	C=5	0.385753	0.00198904	0.0150793	0.0383874	0.0703099	0.343825	0.309621	0.105936	0.0716302	0.00404271	0.480644	0.386883	0.192286	0.105875	0.0449159
	C=6	0.39707	0.011907	0.0505911	0.0152768	0.0349459	0.413569	0.246539	0.12118	0.0586023	0.0204306	0.446317	0.342078	0.137173	0.100518	0.0459068
	C=7	0.344892	0.0142971	0.0502403	0.0102783	0.0342854	0.456383	0.256728	0.0991815	0.0342018	0.00553016	0.452109	0.45438	0.149835	0.0850965	0.0319269
	C=8	0.401958	0.00906131	0.0508601	0.0149429	0.0342089	0.281323	0.218728	0.0847067	0.0363645	0.0157098	0.332246	0.193856	0.116672	0.0530344	0.0328004
me_cnv	C=2	0.0593356	0.905771	-0.00306776	0.00469777	-0.00408512	0.614177	0.510982	0.447313	0.231711	0.126428	0.959024	0.879646	0.0349835	0.00800105	0.0107517
	C=3	0.796518	0.830716	0.0697465	0.0894588	0.0249255	0.323987	0.549052	0.288027	0.272785	0.167596	0.93557	0.417267	0.556435	0.0086066	-0.000292602
	C=4	0.809647	0.700358	0.0972419	0.126237	0.0337681	0.507974	0.405676	0.397066	0.279954	0.166554	0.569803	0.740249	0.520159	0.176972	0.0303111
	C=5	0.566608	0.493925	0.0389422	0.0393203	0.0332915	0.517191	0.429388	0.336675	0.115421	0.196078	0.83767	0.757752	0.318667	0.187244	0.0520231
	C=6	0.54126	0.507149	0.0941635	0.0402593	0.0304844	0.490633	0.310334	0.334168	0.153326	0.185683	0.657467	0.817392	0.438062	0.220611	0.0274881
	C=7	0.692816	0.536202	0.110851	0.0409477	0.0707203	0.48167	0.407864	0.304416	0.187436	0.131119	0.878865	0.499522	0.343636	0.243099	0.115164
	C=8	0.707885	0.530503	0.0707375	0.0491575	0.0782618	0.508788	0.401705	0.275209	0.193264	0.11506	0.58765	0.573279	0.330251	0.302887	0.0599912
m_mi_me	C=2	0.615702	0.0506572	0.0367693	-0.00409116	-0.00480428	0.828659	0.504329	0.428874	0.252564	-0.00264461	0.866808	0.743099	0.504298	0.238876	0.0350777
	C=3	0.271397	0.330557	0.0266734	0.0212459	-0.0102894	0.287471	0.209191	0.338327	0.130572	0.0494675	0.914592	0.277828	0.18015	0.039876	0.0490756
	C=4	0.570017	0.312597	0.0848274	0.0349093	0.0107368	0.573606	0.39232	0.247352	0.0333219	0.0363147	0.849812	0.725963	0.233987	0.19209	0.084522
	C=5	0.554261	0.304288	0.102426	0.0286652	0.0150619	0.432246	0.274186	0.189144	0.0324323	0.0238109	0.469744	0.492109	0.267229	0.129961	0.0350112
	C=6	0.453657	0.282145	0.116702	0.035366	0.009608	0.40338	0.360363	0.203636	0.0277411	0.0143117	0.675644	0.603738	0.278869	0.132173	0.0504159
	C=7	0.402792	0.324603	0.069017	0.0212327	0.00823807	0.456414	0.410645	0.141566	0.0477795	0.0266364	0.435721	0.352989	0.332349	0.132094	0.0434989
	C=8	0.372665	0.338417	0.0685931	0.0219377	0.0103209	0.596351	0.319211	0.166728	0.0591954	0.0360446	0.444701	0.477524	0.251353	0.118378	0.0625312
m_mi_cnv	C=2	-0.000706368	0.27393	0.0680704	-0.00295683	-0.00755162	0.0325897	-0.0060981	-0.00350087	-0.0238144	-0.0017174	0.892688	0.707836	0.554549	0.0497561	0.0323944
	C=3	0.15912	0.250845	0.029406	-0.00395641	-0.0209316	0.436945	0.325009	0.21777	0.148731	0.0414538	0.374769	0.490728	0.339442	0.1031	0.0220713
	C=4	0.184413	0.220014	0.0271624	0.000669804	-0.0197436	0.377507	0.263505	0.13689	0.0731975	0.0122754	0.822567	0.656842	0.44733	0.0837413	0.0301398
	C=5	0.0899876	0.146928	0.0528489	0.00445763	-0.00466286	0.382105	0.256224	0.12908	0.07912	0.0276266	0.474321	0.498397	0.401392	0.137898	0.0383939
	C=6	0.0671899	0.153646	0.0700835	-0.00143684	0.00113805	0.434452	0.265603	0.145311	0.0576195	0.0074976	0.563872	0.444098	0.336464	0.0555805	0.0480742
	C=7	0.0688386	0.150626	0.0626005	-0.000152142	0.00550505	0.545829	0.310334	0.149771	0.0890897	0.00758699	0.417648	0.562407	0.248638	0.0985606	0.0418818
	C=8	0.268771	0.126251	0.0435884	-0.00360406	0.00598316	0.319797	0.242882	0.117886	0.0431453	0.00913265	0.51368	0.340086	0.291642	0.136631	0.0513311
m_me_cnv	C=2	0.288653	0.00250106	-0.000667561	-0.00127666	0.00223201	0.636928	0.494035	0.413099	0.382186	0.206647	0.514145	0.754929	0.288677	0.142575	0.117472
	C=3	0.387358	0.378957	0.328762	0.2473	-0.00601736	0.150533	0.533575	0.496188	0.238772	0.183023	0.898969	0.322818	0.360561	0.158017	0.060984
	C=4	0.326339	0.410448	0.43048	0.279307	0.079925	0.446454	0.450958	0.33694	0.319261	0.289637	0.944344	0.904742	0.326157	0.27771	0.0914781
	C=5	0.264172	0.219084	0.256584	0.172073	0.0653408	0.361202	0.302296	0.214488	0.146584	0.11296	0.591951	0.632381	0.726182	0.303626	0.106485
	C=6	0.261321	0.289365	0.217236	0.176977	0.157426	0.29033	0.303902	0.263202	0.170313	0.141012	0.613588	0.518496	0.560144	0.392358	0.0985153
	C=7	0.265573	0.260869	0.218583	0.19302	0.12661	0.399727	0.362473	0.362709	0.204024	0.167122	0.660657	0.564316	0.542746	0.367826	0.0549632
	C=8	0.285298	0.307046	0.21351	0.185315	0.148357	0.601894	0.359127	0.355804	0.169204	0.134298	0.657835	0.526923	0.484086	0.308958	0.0975704
mi_me_cnv	C=2	0.212012	0.00387558	-0.0390952	0.00138661	0.0299703	0.0394313	0.0120719	0.00644581	-0.0104719	0.0155655	0.918948	0.76708	0.351098	0.245596	0.117438
	C=3	0.107751	-0.0123824	-0.021335	0.000875464	0.00520316	0.47338	0.222971	0.270895	0.164906	0.047928	0.497023	0.402003	0.381105	0.207156	0.0561575
	C=4	0.0244586	-0.00849104	-0.0120565	-0.0119771	-0.00120408	0.29687	0.195382	0.138273	0.0890507	0.0165006	0.402844	0.287989	0.219231	0.131735	0.0498165
	C=5	0.246814	0.00541717	-0.0228869	-0.0124237	-0.00827665	0.453968	0.285522	0.206144	0.0766166	0.0364357	0.535435	0.252891	0.205163	0.0890982	0.0476601
	C=6	0.114698	0.00466032	-0.0242487	-0.0190037	-0.0133142	0.363912	0.305752	0.163698	0.0502084	0.0170147	0.491709	0.532948	0.15286	0.069396	0.0450629
	C=7	0.192349	0.0142138	-0.0397324	-0.022997	-0.000124674	0.469381	0.269104	0.146354	0.0218377	0.0222039	0.481874	0.322398	0.168266	0.0710162	0.0358437
	C=8	0.313725	0.0410669	0.0106694	-0.00100736	0.0228159	0.295585	0.250696	0.140649	0.0307433	0.014576	0.367032	0.316409	0.121259	0.0498346	0.0312071
m_mi_me_cnv	C=2	1	-0.0114858	-2.14e-05	0.00173637	0.0224497	0.0544351	0.006824	-0.006443	-0.00179249	-0.00461787	0.85401	0.38479	0.0742926	0.0127643	0.0350696
	C=3	0.831505	0.0322871	0.00923708	0.0181196	0.0283859	0.445031	0.436243	0.252371	0.129467	0.0331168	0.908959	0.224105	0.203855	0.113606	0.0450778
	C=4	0.716689	0.0431346	0.0152621	-0.00632549	0.0355386	0.306586	0.313726	0.123535	0.0518531	0.0206191	0.864641	0.705204	0.358252	0.13589	0.0311782
	C=5	0.73283	0.0428663	0.0217972	-0.0197297	0.03482	0.3748	0.313939	0.23421	0.0657964	0.0237797	0.459761	0.462203	0.354291	0.13329	0.0640559
	C=6	0.567467	0.049757	0.026427	-0.00986395	0.0155892	0.364226	0.296377	0.217237	0.0327276	0.00845887	0.657529	0.447893	0.330477	0.169616	0.0459752
	C=7	0.391779	0.218809	0.0283608	-0.0155509	0.0311861	0.414227	0.314871	0.210981	0.00665686	0.0120884	0.579266	0.404637	0.308222	0.124573	0.0397945
	C=8	0.575612	0.216981	0.0188683	-0.0154788	0.0379812	0.331864	0.259712	0.190374	0.0148809	0.00765297	0.475817	0.505498	0.318645	0.16203	0.0610674
Methods		Subtype-GAN
Data Comb.	Noise Level	0.5	1	2	3	4
m_mi	C=2	0.319515	0.350039	0.252141	0.279935	0.0814394
	C=3	0.660196	0.4431	0.424594	0.316581	0.101223
	C=4	0.463135	0.391605	0.344612	0.247007	0.0955954
	C=5	0.442227	0.423102	0.284648	0.270356	0.0927218
	C=6	0.387032	0.422109	0.26008	0.230578	0.0978963
	C=7	0.357621	0.339554	0.194344	0.205705	0.0798265
	C=8	0.253417	0.275031	0.204271	0.185791	0.0672363
m_me	C=2	0.294105	0.288373	0.250066	0.142942	0.212619
	C=3	0.367532	0.385931	0.330961	0.15644	0.161615
	C=4	0.299008	0.294921	0.273342	0.155607	0.203061
	C=5	0.500885	0.465487	0.260152	0.180433	0.170774
	C=6	0.405871	0.470662	0.30798	0.174045	0.163135
	C=7	0.398924	0.423267	0.30793	0.157177	0.148908
	C=8	0.336337	0.343848	0.214125	0.130108	0.108957
m_cnv	C=2	0.320122	0.309951	0.217441	0.170211	0.0889857
	C=3	0.415032	0.337205	0.225755	0.292365	0.137552
	C=4	0.379416	0.352266	0.215587	0.269882	0.121334
	C=5	0.443689	0.491828	0.232255	0.297234	0.101464
	C=6	0.395449	0.422875	0.230173	0.264763	0.0889717
	C=7	0.384487	0.438232	0.244967	0.253409	0.0743877
	C=8	0.311958	0.312774	0.151972	0.1909	0.0651405
mi_me	C=2	0.222572	0.135063	0.0724532	0.0142949	0.0300587
	C=3	0.176125	0.261543	0.184887	0.0668794	0.0331942
	C=4	0.294703	0.286211	0.197213	0.0641287	0.0197859
	C=5	0.279165	0.300496	0.166479	0.0452161	0.024652
	C=6	0.26599	0.270255	0.156753	0.0509623	0.0226709
	C=7	0.280354	0.253908	0.154526	0.0460395	0.013195
	C=8	0.255816	0.238203	0.153214	0.0422772	0.0188857
mi_cnv	C=2	0.18059	0.207261	0.0834352	0.0177654	0.000537548
	C=3	0.180882	0.299497	0.114507	0.0122826	0.00403191
	C=4	0.304201	0.282189	0.137542	0.0495569	0.0112766
	C=5	0.30499	0.301177	0.10708	0.042188	0.00669763
	C=6	0.287423	0.314784	0.122084	0.0494059	-0.000239141
	C=7	0.245523	0.292492	0.108077	0.0467706	0.00159484
	C=8	0.270834	0.246188	0.105287	0.0465975	0.0143665
me_cnv	C=2	0.237052	0.227356	0.239054	0.198111	0.130965
	C=3	0.202534	0.31632	0.2888	0.115965	0.136716
	C=4	0.322652	0.418574	0.30247	0.173949	0.160354
	C=5	0.350197	0.291062	0.279671	0.163272	0.129444
	C=6	0.347607	0.428018	0.287411	0.146915	0.123626
	C=7	0.306203	0.282379	0.210604	0.136776	0.108518
	C=8	0.257115	0.333473	0.240076	0.115502	0.0849836
m_mi_me	C=2	0.194587	0.204409	0.16936	0.155682	0.129228
	C=3	0.342365	0.458146	0.283589	0.26617	0.111469
	C=4	0.413274	0.308907	0.34484	0.275994	0.086147
	C=5	0.334248	0.275656	0.259731	0.255633	0.0838453
	C=6	0.397959	0.330576	0.317579	0.224371	0.069666
	C=7	0.335586	0.321299	0.22504	0.161011	0.0826361
	C=8	0.310263	0.293421	0.244979	0.169504	0.0652868
m_mi_cnv	C=2	0.255048	0.291309	0.267557	0.251338	0.00201653
	C=3	0.408015	0.219437	0.326747	0.255523	0.0267564
	C=4	0.491953	0.2149	0.342633	0.263331	0.0408918
	C=5	0.4105	0.210075	0.281813	0.166252	0.0442653
	C=6	0.431458	0.219337	0.243778	0.18421	0.0383905
	C=7	0.354722	0.301735	0.277455	0.161606	0.0290439
	C=8	0.213477	0.187904	0.184062	0.130709	0.0321163
m_me_cnv	C=2	0.244349	0.285249	0.324477	0.202845	0.0786961
	C=3	0.344215	0.203819	0.316003	0.250411	0.0912417
	C=4	0.282966	0.230629	0.357968	0.191974	0.0916261
	C=5	0.308237	0.274953	0.283797	0.165159	0.0842133
	C=6	0.312734	0.252361	0.244211	0.147156	0.0705334
	C=7	0.27125	0.323607	0.186369	0.137227	0.0598807
	C=8	0.264962	0.183933	0.208577	0.144182	0.0528982
mi_me_cnv	C=2	0.0986975	0.1411	0.0602259	0.0372766	0.00611915
	C=3	0.157556	0.304069	0.146681	0.0559894	-0.00104262
	C=4	0.269156	0.29446	0.14	0.0410248	0.00214305
	C=5	0.286031	0.247354	0.114413	0.0449335	0.00538481
	C=6	0.286127	0.215369	0.120997	0.0412087	0.00511004
	C=7	0.271513	0.201452	0.108901	0.0316142	0.00188251
	C=8	0.279982	0.188033	0.132843	0.0302301	-0.00330831
m_mi_me_cnv	C=2	0.25272	0.240816	0.251376	0.160613	0.00154491
	C=3	0.205233	0.250036	0.258171	0.131073	0.0104524
	C=4	0.224024	0.228101	0.354866	0.165095	0.0289717
	C=5	0.364422	0.293023	0.291555	0.131058	0.0243567
	C=6	0.250056	0.333949	0.267104	0.147088	0.0276348
	C=7	0.275585	0.3394	0.236431	0.1352	0.0280706
	C=8	0.280434	0.215289	0.199557	0.0932406	0.0210949
